# Supplementary material for: Development of a multi-responsive fluorescence switch system based on a pyrimidine functionalized tetrarylethylene compound
Source: Royal Society of Chemistry journal article supplement (doi:10.1039/d3tc04150f), 2024-01-01
Supplement: d3tc04150f1.pdf [file d3tc04150f1.pdf]

*†Electronic Supplementary Information*

**For**

**Development of a multi-responsive fluorescence switch system based  
on a pyrimidine functionalized tetrarylethylene compound**

Renjie Wang <sup>a,b\*</sup>, Shunyang Liu<sup>b</sup>, Chunhong Zheng<sup>b</sup>, Yanqun Mu<sup>b</sup>, Mengyuan Li<sup>b</sup>, Gang Li <sup>a</sup>,

Shouzhi Pu <sup>a,b\*</sup>

<sup>a</sup> *Department of Ecology and Environment, Yuzhang Normal University, Nanchang 330103,*

*China*

<sup>b</sup>*Jiangxi Key Laboratory of Organic Chemistry, Jiangxi Science and Technology Normal*

*University, Nanchang 330013, P. R. China*

\*Corresponding author 1: E-mail address: bio-wrj@163.com

\*Corresponding author 2: E-mail address: pushouzhi@tsinghua.org.cn

## 1. Experimental section

### 1.1 General methods

All the chemicals and reagents used for the synthesis of **1** and **2** were purchased from a variety of commercial sources without further purification.  $^1\text{H}$  NMR and  $^{13}\text{C}$  NMR spectra were measured on Bruker AV500 (500 MHz) spectrometer, using  $\text{CDCl}_3$  as the solvent and TMS as the internal standard. Agilent 1100 ion trap MSD spectrometer was used for mass spectrometry. UV/Vis spectra were tested on Agilent 8454 spectrophotometer. Fluorescence spectra were captured by a Hitachi F-4600 spectrophotometer. Quantum yield was measured with Hamamatsu Absolute PL Quantum Yield Spectrometer C11347-11. WRS-1B melting point apparatus was used to gain the melting point. The UV and visual light sources were irradiated with MUA-165 and MVL-210, respectively. Luminescent decay experiments were determined by Edinburgh FLS 980 spectrophotometer.

### 1.2 Synthesis

The synthetic route of **TPT-2-PAo** and **BTPT-2-PAo** are shown in [Scheme S1](#). First of all, compound **1** was synthesized by the method reported [\[1\]](#). Then, the target molecules **TPT-2-PAo** and **BTPT-2-PAo** were synthesized by one-pot condensation reaction.

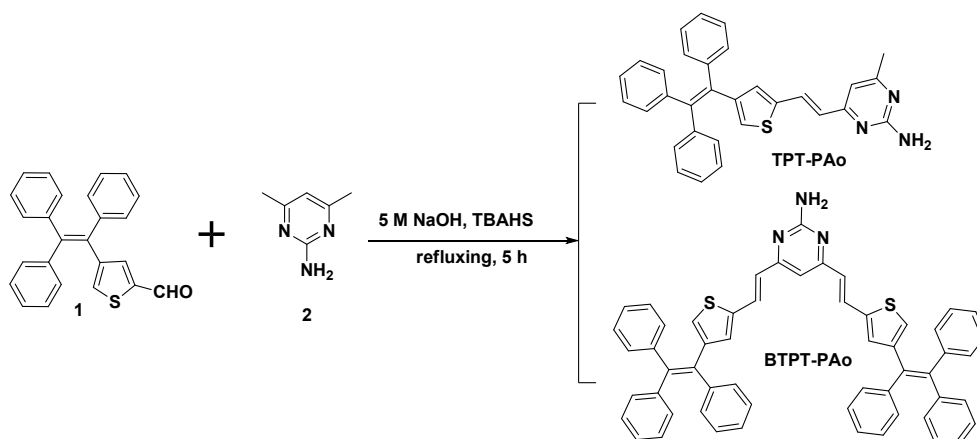

**Scheme S1.** The synthetic route of **TPT-2-PAo** and **BTPT-2-PAo**.

### 1.2.1 Synthesis of 4-methyl-6-(2-(4-(1,2,2-triphenylvinyl)thiophene-2-yl)vinyl)pyrimidine-2-amine (TPT-2-PAo)

4-(1, 2, 2-Triphenylvinyl)thiophene-2-carbaldehyde (**1**, 1.00 g, 2.70 mmol) and TBAHS (0.92 g, 2.70 mmol) were put into a 100 mL three-necked flask, with 80 mL 5M sodium hydroxide. Then, argon was fed into and stirred, 4,6-dimethylpyrimidin-2-amine (**2**, 0.67 g, 5.40 mmol) were added after 5 min. The reaction was heated reflux for 5 h at 120 °C. Subsequently, the crude products were dissolved in dichloromethane, and extracted. It was dried with anhydrous sodium sulfate and then purified by column chromatography. In the first place, petroleum ether and ethyl acetate (v:v = 5:1) was used as the eluate to obtained crude product **TPT-2-PAo**, then dichloromethane and ethyl acetate (v:v = 10:1) mixed solvent as the eluate continue to separated and obtained crude product **BTPT-2-PAo**. After that, two products were recrystallized with *n*-hexane and dried. The last, a light yellow solid is the target product **TPT-2-PAo** (0.40 g, 0.85 mmol) in 31% yield. M. p.: 196–197 °C. <sup>1</sup>H NMR (500 MHz, CDCl<sub>3</sub>): δ 2.26 (s, 3H), 4.98 (s, 2H), 6.36 (s, 1H), 6.44 (d, *J* = 20.0 Hz, 1H), 6.59 (s, 1H), 6.64 (s, 1H), 6.91 (t, *J* = 5.0 Hz, 2H), 7.00–7.03 (m, 4H), 7.06 (d, *J* = 5.0 Hz, 5H), 7.14 (d, *J* = 10.0 Hz, 3H), 7.19 (s, 1H), 7.54 (d, *J* = 15.0 Hz, 1H). <sup>13</sup>C NMR (126 MHz, CDCl<sub>3</sub>, ppm): δ = 22.76, 108.14, 123.72, 125.44, 125.71, 126.00, 126.58, 126.66, 126.74, 127.08, 128.30, 129.71, 130.08, 130.13, 131.17, 133.80, 138.57, 140.15, 141.84, 142.12, 142.60, 143.85, 161.37, 161.92, 167.13 (Fig. S1). HRMS-ESI (*m/z*): [M + H]<sup>+</sup> Calcd. For (C<sub>31</sub>H<sub>25</sub>N<sub>3</sub>S<sup>+</sup>), 472.1769, found: 472.1828 (Fig. S2A).

### 1.2.2 4,6-Bis-2-(4-(1,2,2-triphenylvinyl)thiophen-2-yl)vinyl)pyrimidine-2-amine (BTPT-2-PAo)

**BTPT-2-PA** (0.35 g, 0.43 mmol) was recrystallization from dichloromethane, yielding 16%. M.

p.:141–142°C . <sup>1</sup>H NMR (500 MHz, CDCl<sub>3</sub>): δ 4.90 (s, 2H), 6.47 (s, 1H), 6.53 (d, *J* = 15.0 MHz, 2H), 6.65 (s, 2H), 6.71 (s, 2H), 6.99 (t, *J* = 5.0 MHz, 4H), 7.07–7.10 (m, 10H), 7.14 (d, *J* = 5.0 MHz, 10H), 7.22 (t, *J* = 5.0 MHz, 6H), 7.61 (d, *J* = 15.0 MHz, 2H). <sup>13</sup>C NMR (126 MHz, CDCl<sub>3</sub>, ppm): δ = 107.01, 123.97, 125.43, 125.71, 126.01, 126.58, 126.74, 127.08, 128.00, 129.71, 130.09, 130.14, 131.12, 133.81, 138.64, 140.13, 141.85, 142.14, 142.60, 143.85 (Fig. S3). HRMS-ESI (*m/z*): [M + H]<sup>+</sup> Calcd. For (C<sub>56</sub>H<sub>42</sub>N<sub>3</sub>S<sub>2</sub><sup>+</sup>), 820.2820, found: 820.2695 (Fig. S2B).

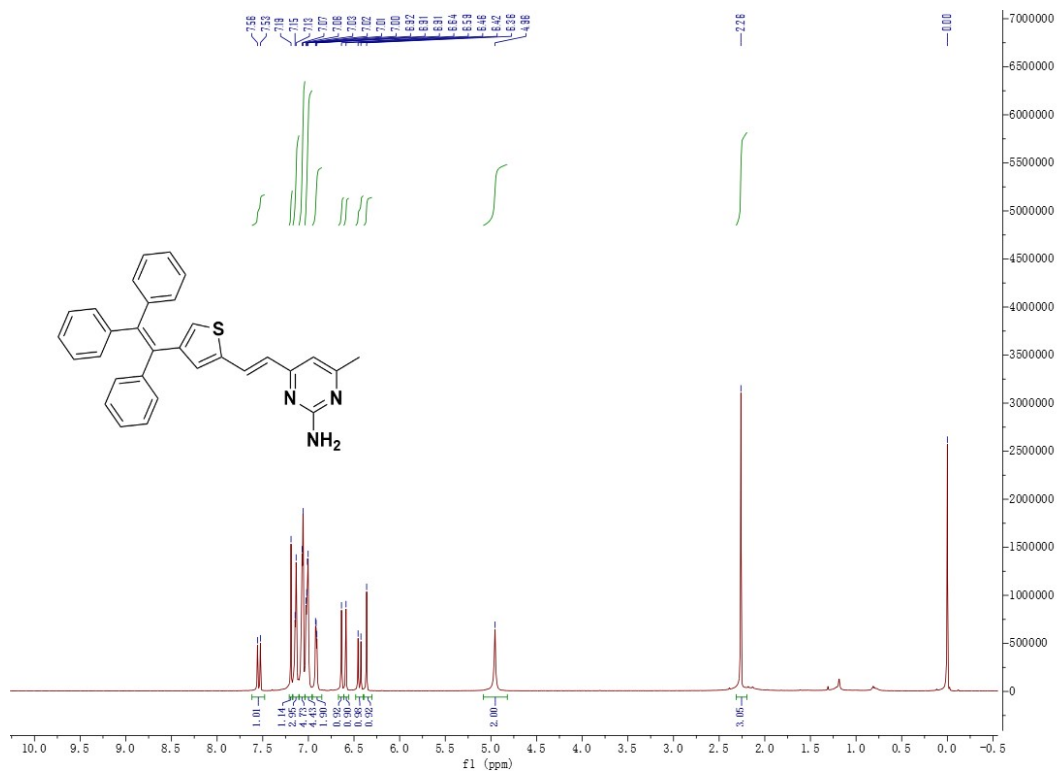

(A)

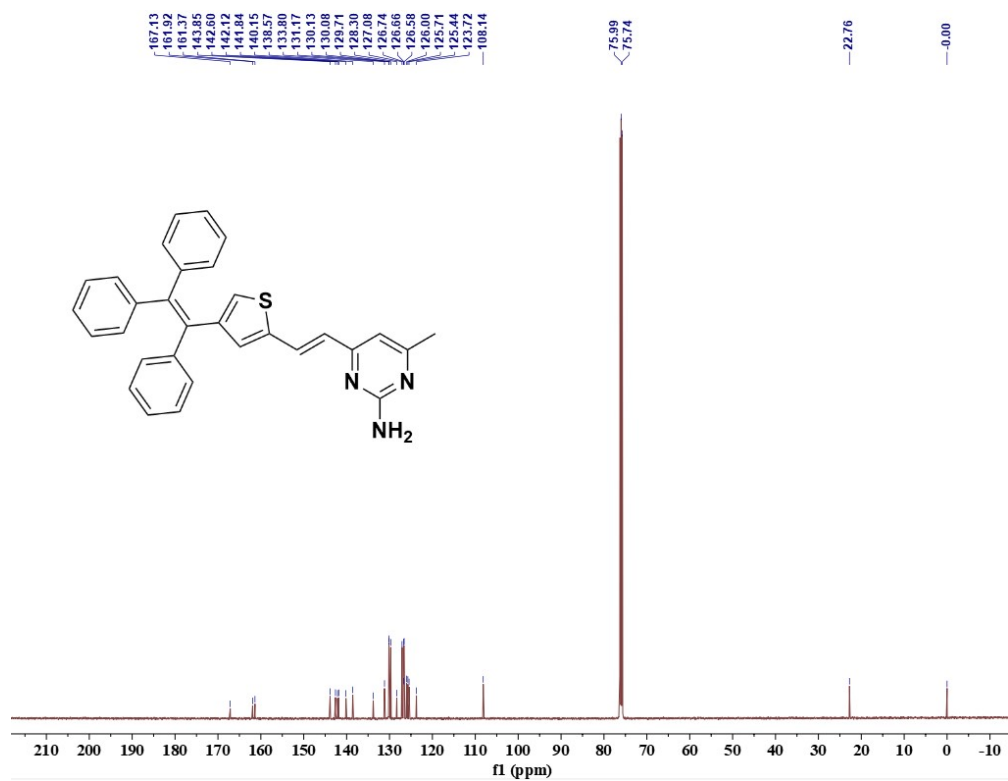

(B)

**Figure S1.** NMR spectra data for TPT-2-PAo in  $\text{CDCl}_3$ : (A)  $^1\text{H-NMR}$  spectrum; (B)  $^{13}\text{C-NMR}$  spectrum.

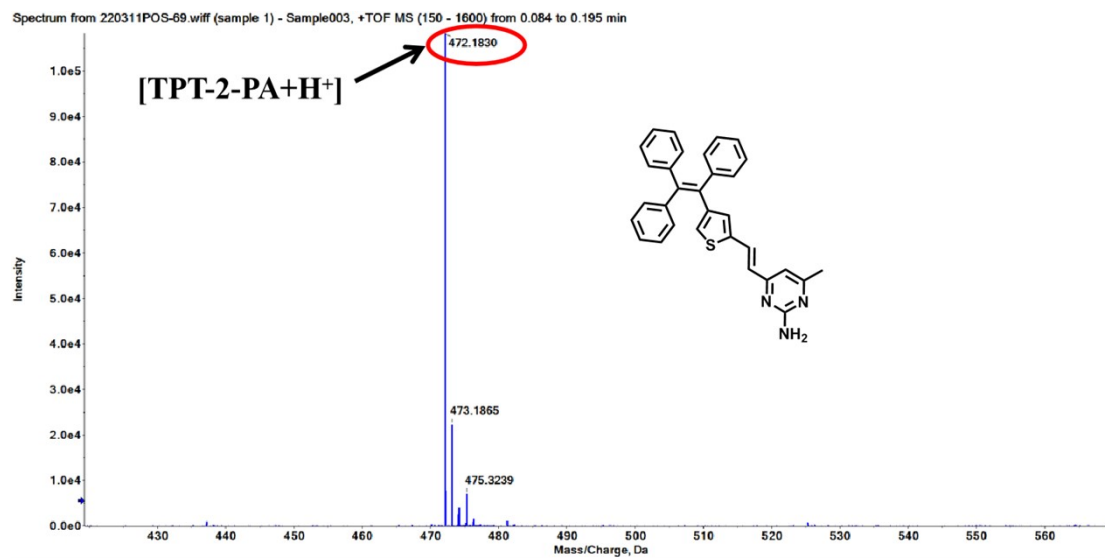

(A)

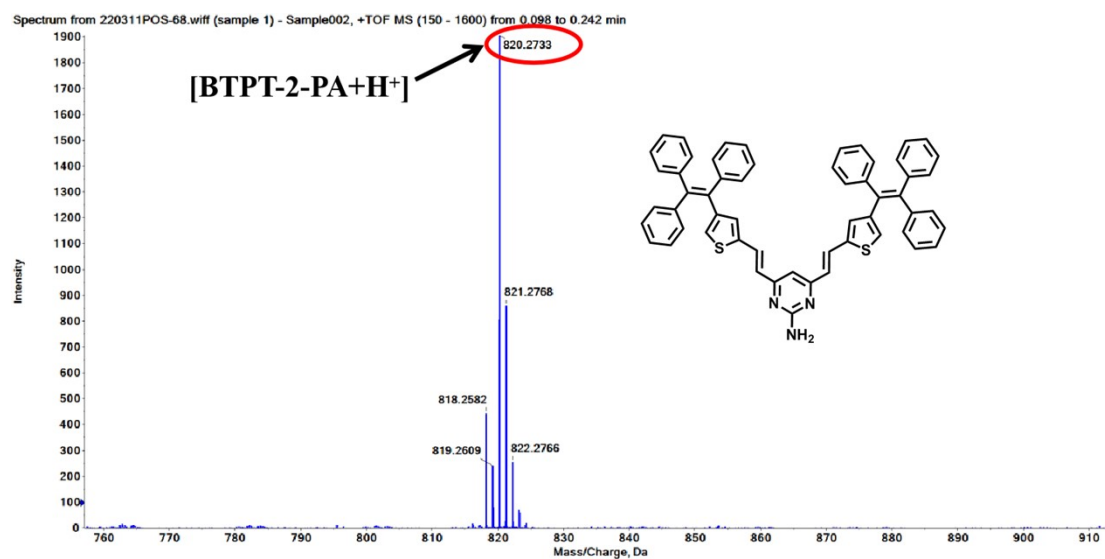

(B)

**Figure S2.** (A) HRMS-ESI spectra of **TPT-2-PAo** in methanol and (B) **BTPT-2-PAo** in acetonitrile.

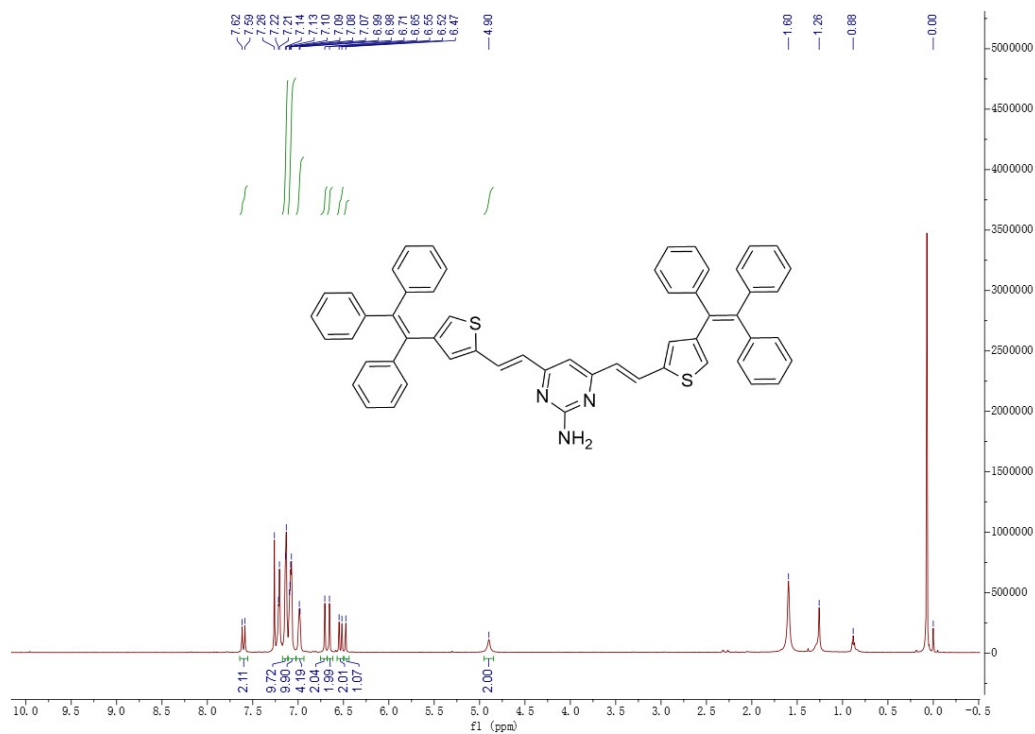

(A)

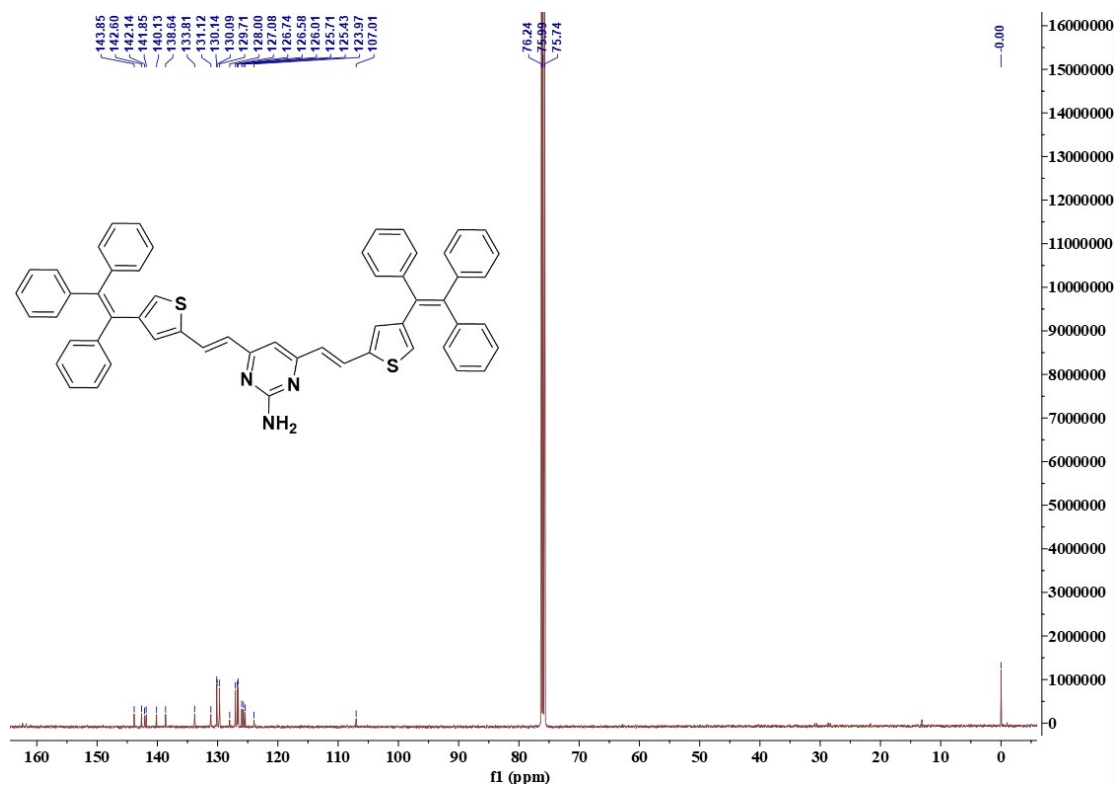

(B)

**Figure S3.** NMR spectra data for **BTPT-2-PAo** in  $\text{CDCl}_3$ : (A)  $^1\text{H}$ -NMR spectrum; (B)  $^{13}\text{C}$ -NMR spectrum.

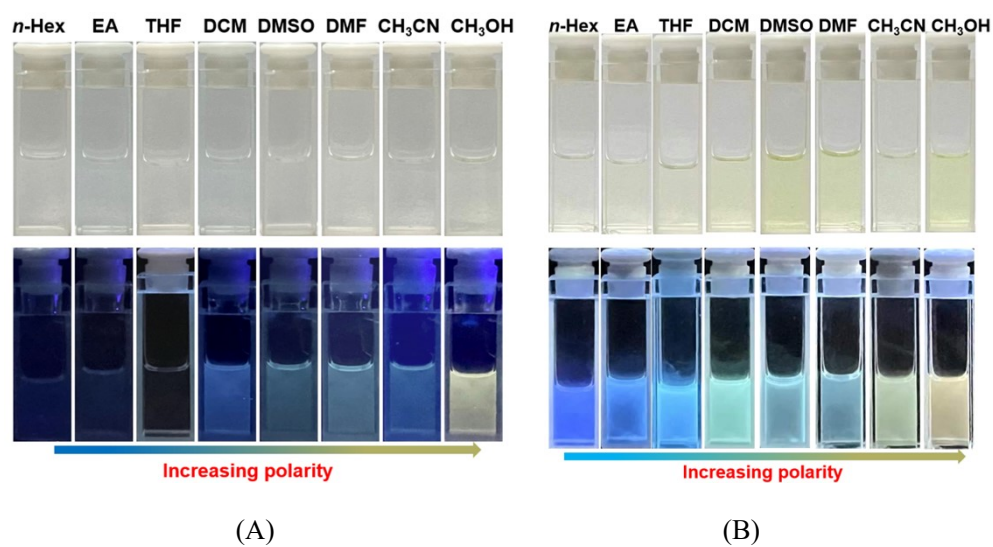

**Figure S4.** (A) Photograph showing the color changes of TPT-2-PAo, and (B) BTPT-2-PAo in different solvents ( $\lambda_{\text{ex}} = 365 \text{ nm}$ ).



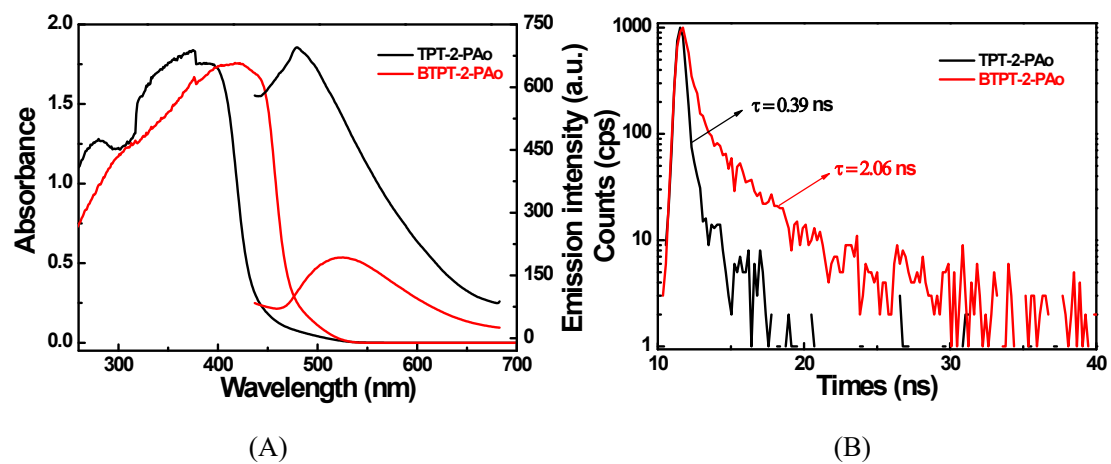

Figure S5. (A) The absorption and PL spectra of TPT-2-PAo and BTPT-2-PAo in solid states, and (B) fluorescence decay curves of them in solid states.

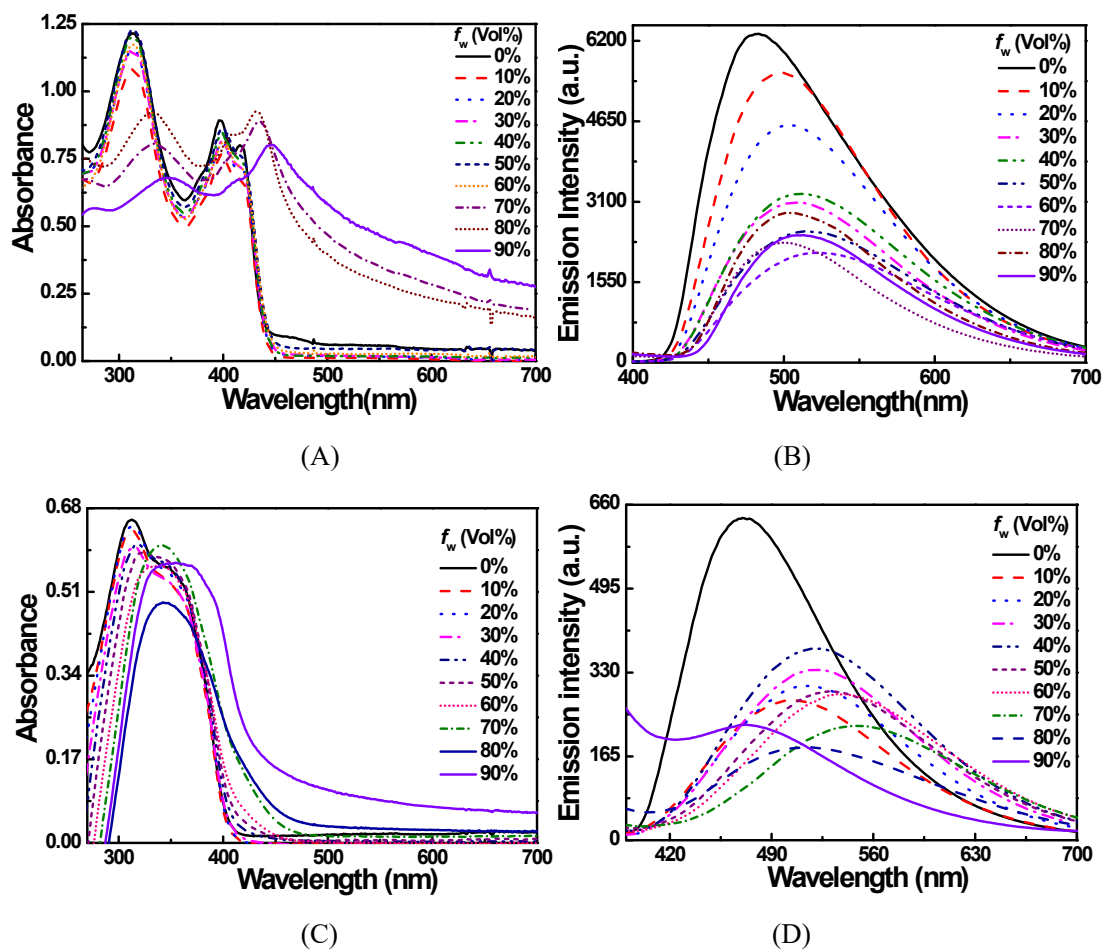

**Figure S6.** Changes of absorption and PL spectra for **TPT-2-PAo** and **BTPT-2-PAo** in THF/H<sub>2</sub>O ( $C = 2.0 \times 10^{-5}$  mol L<sup>-1</sup>) mixtures with different fractions: (A) absorption spectra for **BTPT-2-PAo**, (B) PL intensity for **BTPT-2-PAo**, (C) absorption spectra for **TPT-2-PAo**, and (D) PL intensity for **TPT-2-PAo**.

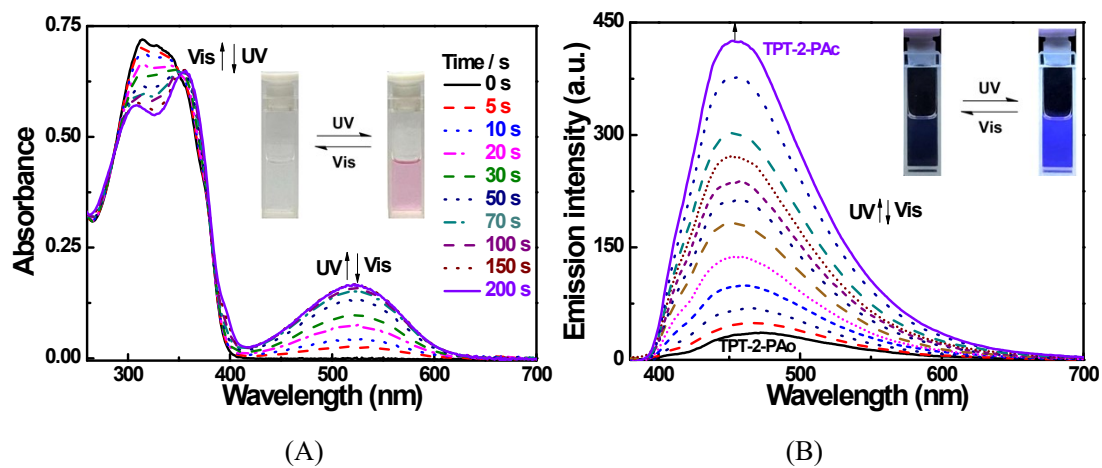

**Figure S7.** Changes in absorption (A) and fluorescence (B) spectra for TPT-2-PAo by photoirradiation with UV and visible in hexane ( $C = 2.0 \times 10^{-5} \text{ mol L}^{-1}$ ) at room temperature (inset: color changes by photoirradiation).

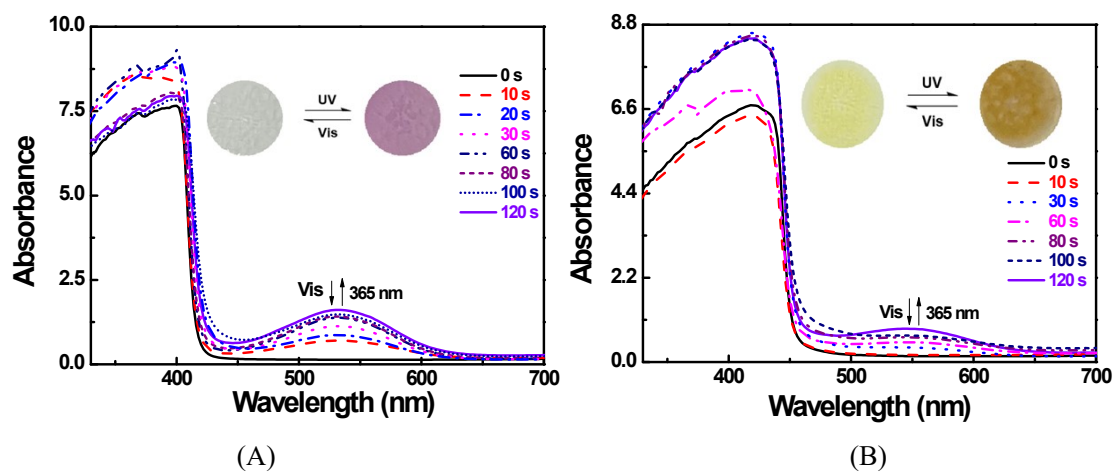

**Figure S8.** Changes in absorption spectral for **TPT-2-PAo** (A) and **BTPT-2-PAo** (B) by photoirradiation with UV and visible light at room temperature in PMMA films (inset: color changes by photoirradiation).

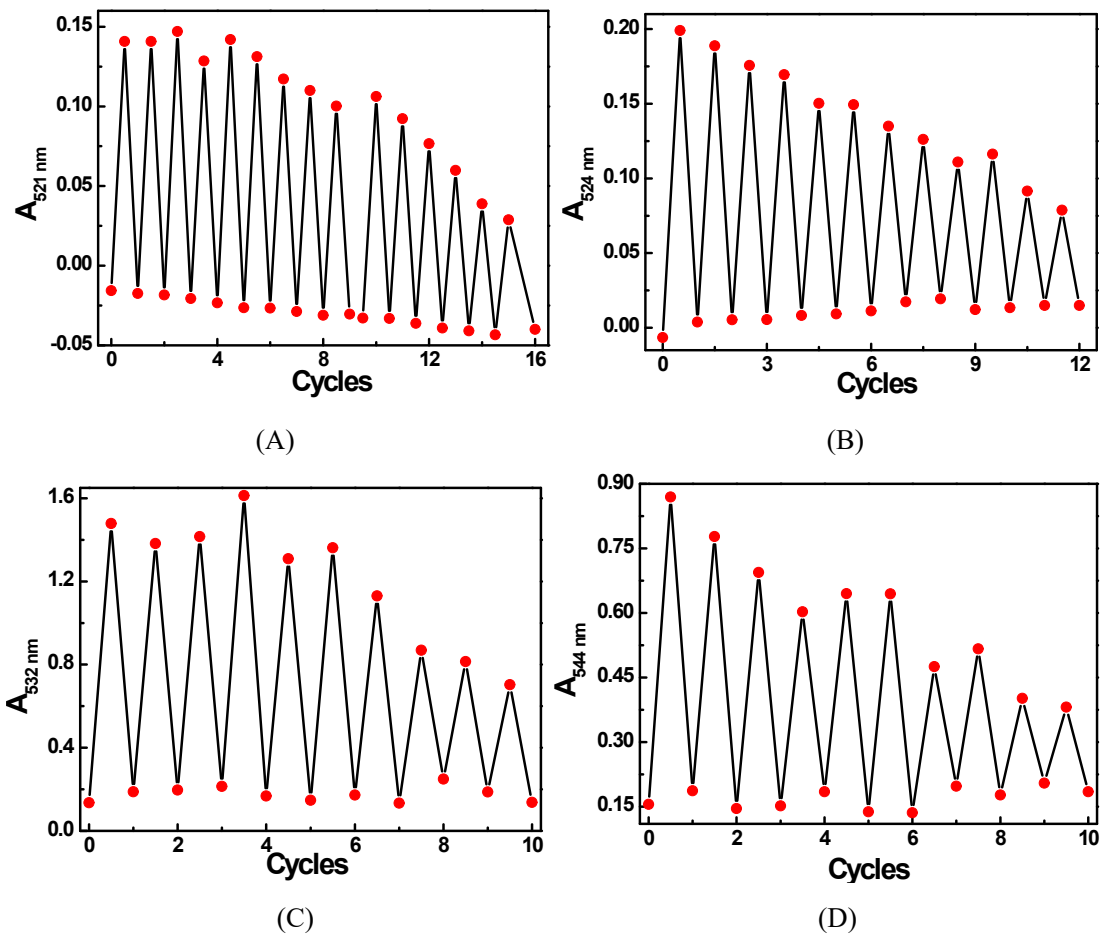

**Figure S9.** Fatigue resistance of **TPT-2-PAo** and **BTPT-2-PAo** upon alternating irradiation with UV and visible light: (A) and (B) in THF, (C) and (D) in PMMA film.

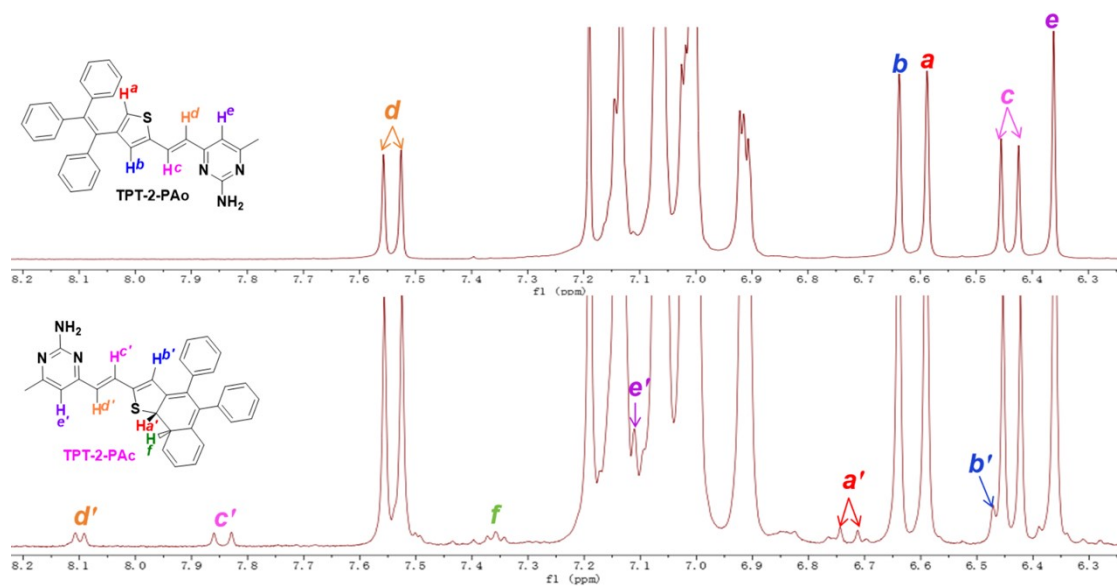

(A)

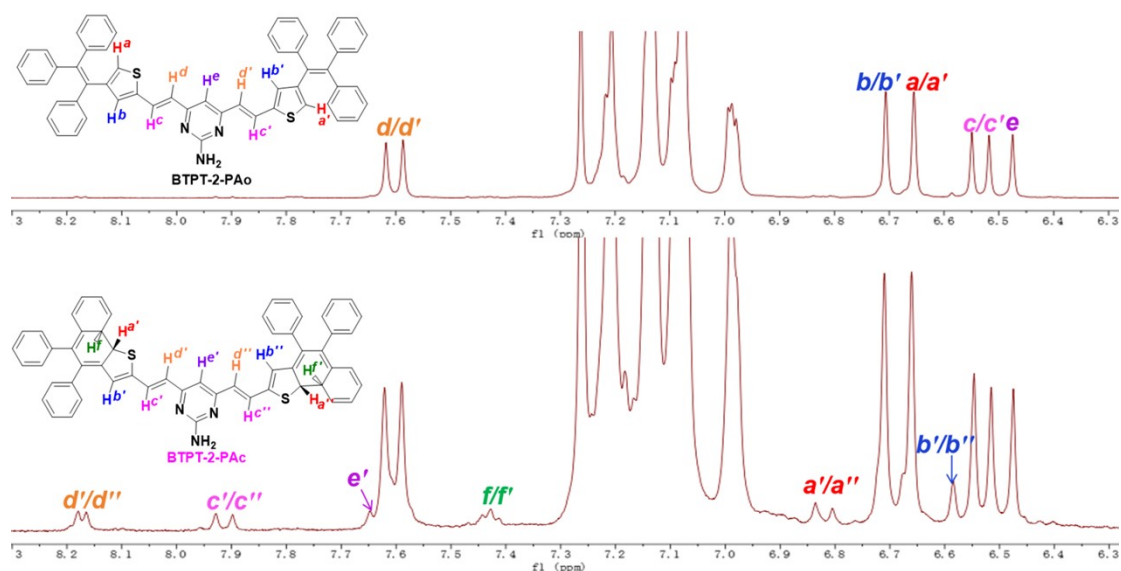

(B)

**Figure S10.** Comparison of  $^1\text{H}$  NMR spectra of TPT-2-PAo (A) and BTPT-2-PAo (B) in  $\text{CDCl}_3$  before and after UV irradiation (insets: corresponding structures).

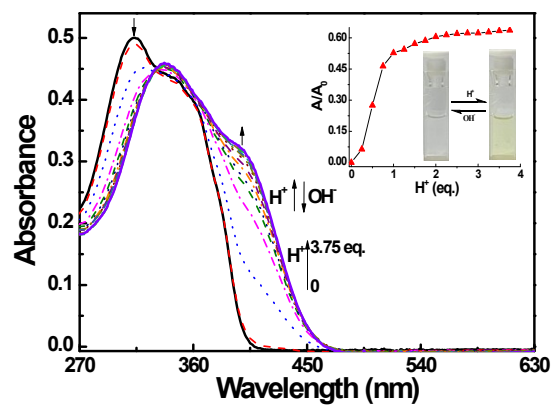

**Figure S11.** Absorption spectral and color changes of TPT-2-PAo by HCl/NaOH stimuli in THF

( $C = 2.0 \times 10^{-5} \text{ mol L}^{-1}$ ).

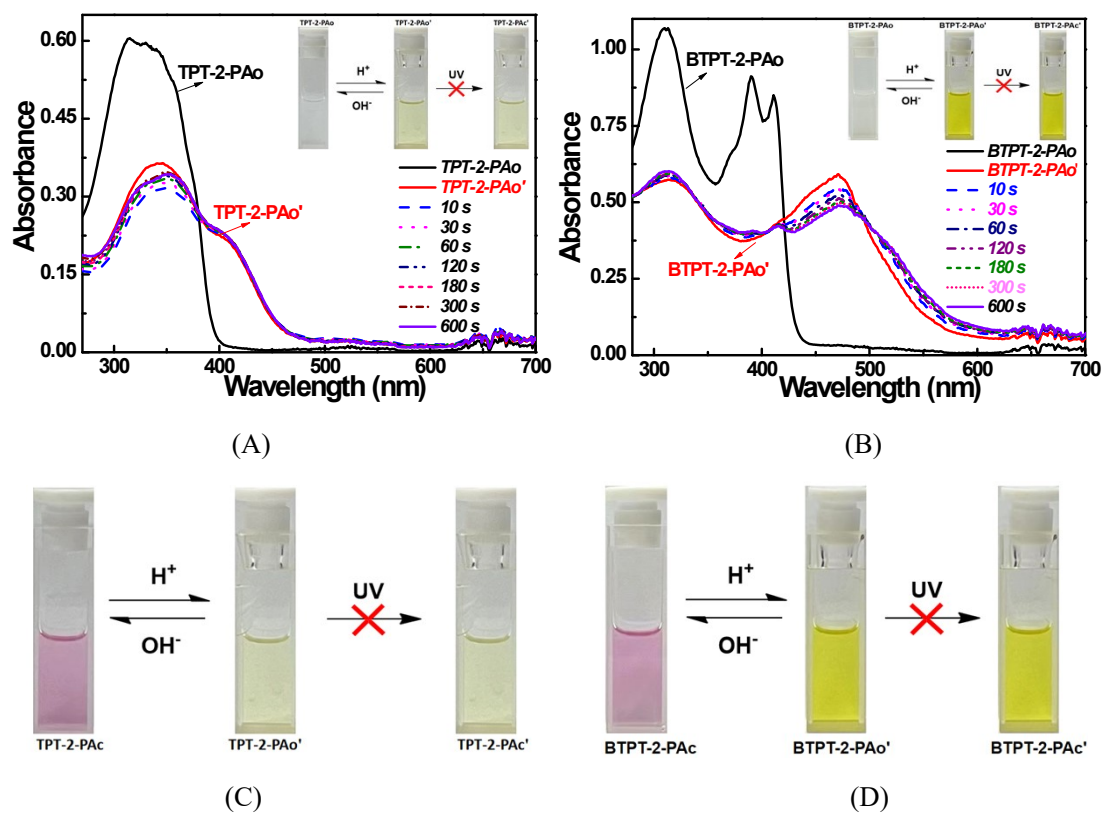

**Figure S12.** (A) Changes in absorption spectral of TPT-2-PAo', and (B) BTPT-2-PAo' by photoirradiation with UV and visible light in *n*-hexane ( $C = 2.0 \times 10^{-5} \text{ mol L}^{-1}$ ) at room temperature (inset: color changes by photoirradiation), (C) and (D) color changes for their closed-ring isomers by stimuli with acid/base and UV light.



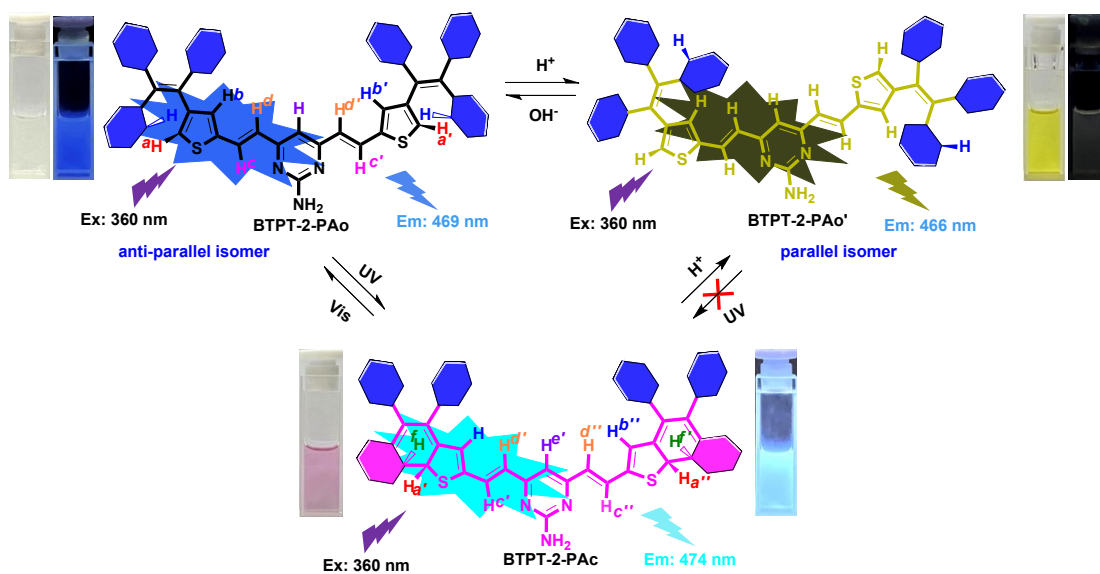

**Figure S13.** Structural, fluorescence and color changes between **BTPT-2-PAo**, and **BTPT-2-PAo'** induced by base and light.

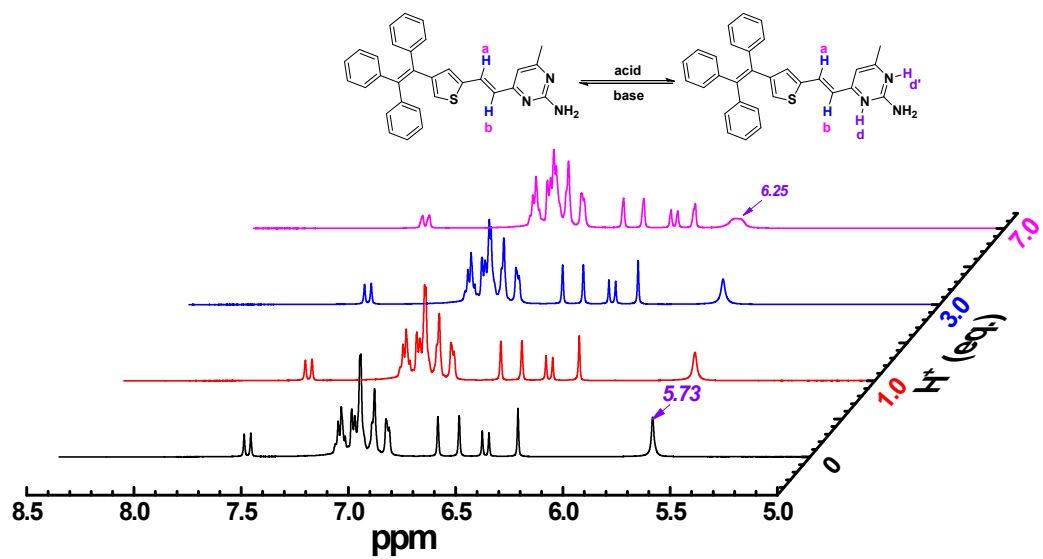

(A)

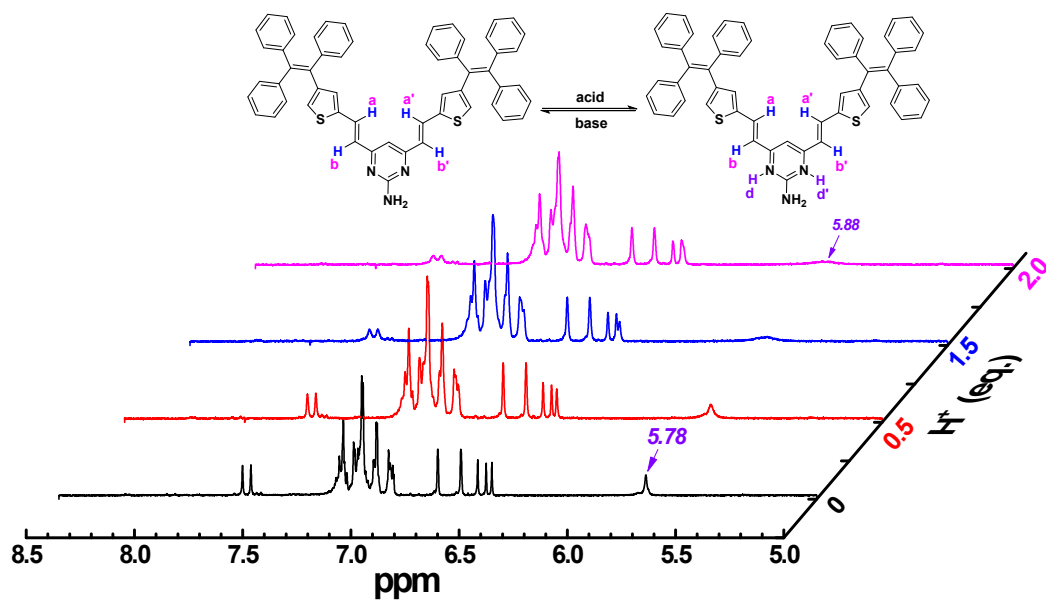

(B)

**Figure S14.** Changes in  $^1\text{H}$  NMR spectra of TPT-2-PAo (A) and BTPT-2-PAo (B) stimuli by different  $\text{H}^+$  concentration in  $\text{THF-}d_8$ .

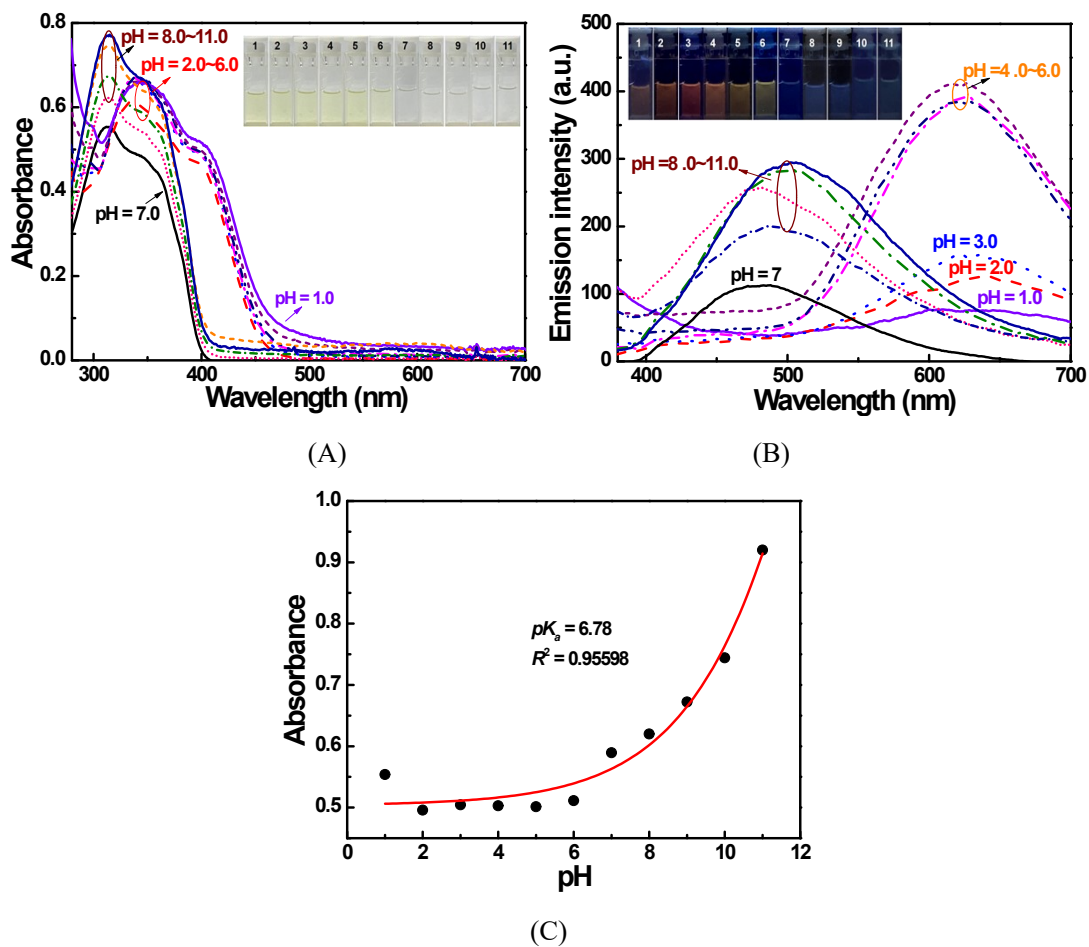

**Figure S15.** Absorption / PL spectra and color changes of **TPT-2-PAo** in various pH values solutions: (A) absorption spectra, (B) PL spectra ( $\lambda_{\text{ex}} = 360 \text{ nm}$ ), and (C) changes of the absorbance spectra of **TPT-2-PAo** with increasing pH from 1.0 to 11.0: sigmoidal fitting of the pH-dependent absorbance intensity at 400 nm.

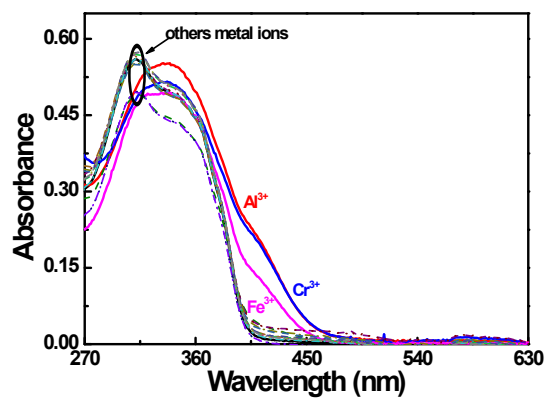

(A)

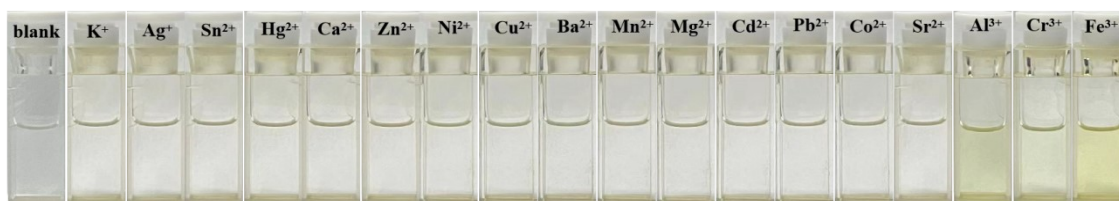

(B)

**Figure S16.** Changes in the absorption of TPT-2-PAo induced by various metal ions (5.0 equiv) in THF ( $C = 2.0 \times 10^{-5} \text{ mol L}^{-1}$ ): (A) absorption spectra, (B) photos of color changes.

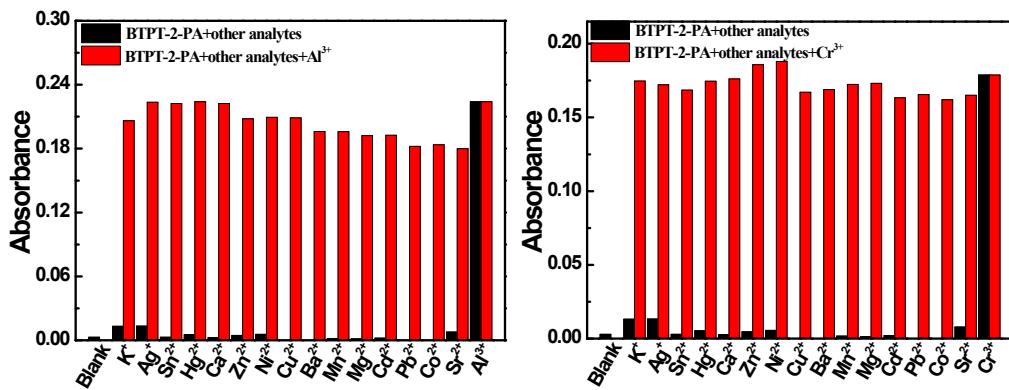

(A)

(B)

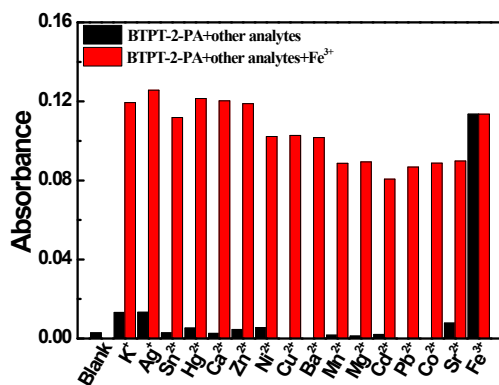

(C)

**Figure S17.** Competitive test showing the absorbance response of **BTPT-2-PAo** to different metal ions (20.0 equiv.) in THF ( $C = 2.0 \times 10^{-5} \text{ mol L}^{-1}$ ). Black bars: **BTPT-2-PAo** with various metal ions; red bars: **BTPT-2-PAo** with different competing metal ions and Al<sup>3+</sup> (A), Cr<sup>3+</sup> (B), and Fe<sup>3+</sup>

(C).

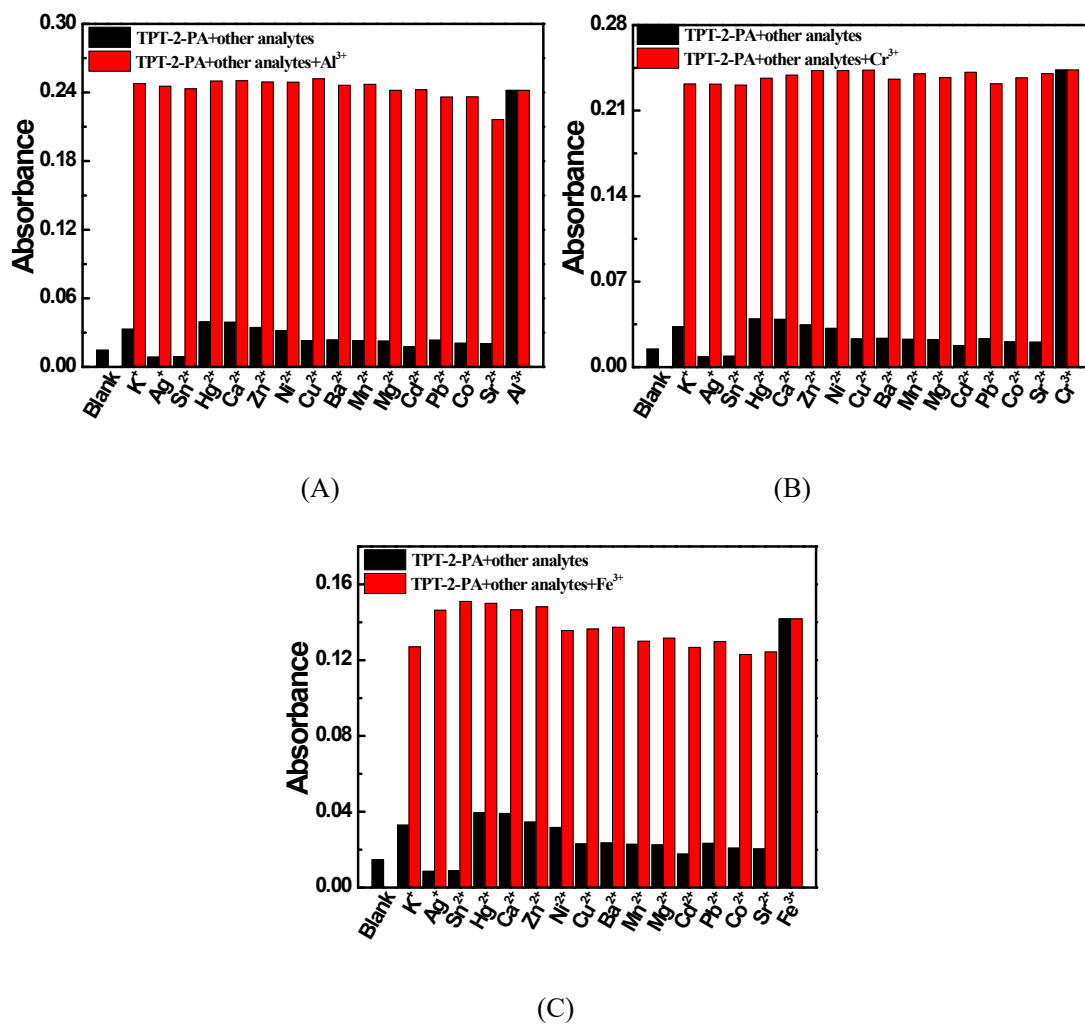

**Figure S18.** Competitive test showing the absorbance response of **TPT-2-PAo** to different metal ions (5.0 equiv.) in THF ( $C = 2.0 \times 10^{-5} \text{ mol L}^{-1}$ ). Black bars: **TPT-2-PAo** with various metal ions; red bars: **TPT-2-PAo** with different competing metal ions and  $\text{Al}^{3+}$ (A),  $\text{Cr}^{3+}$ (B), and  $\text{Fe}^{3+}$ (C).

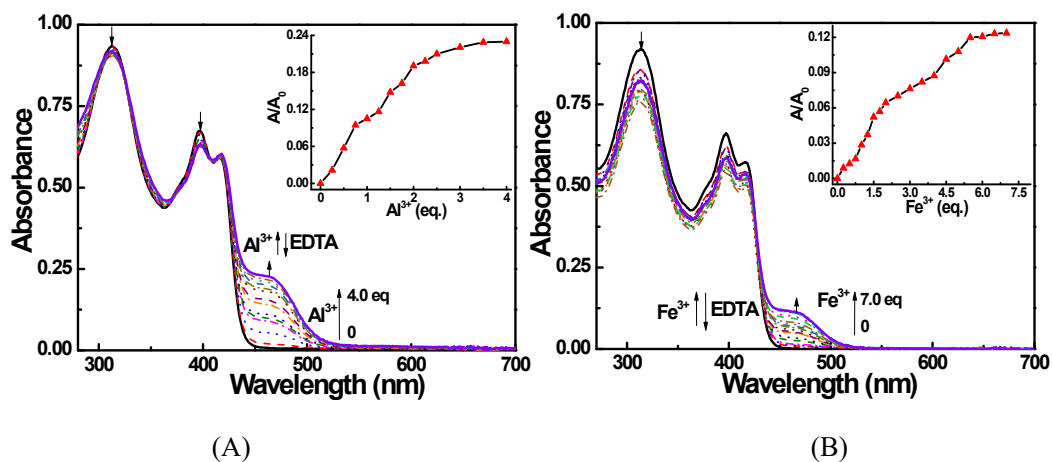

**Figure S19.** Absorption spectral changes of **BTPT-2-PAo** ( $C = 2.0 \times 10^{-5} \text{ mol L}^{-1}$ ) by stimulation with metal ions: (A)  $\text{Al}^{3+}$  (inset: the effect of  $\text{Al}^{3+}$  concentration on absorption intensity at 467 nm), and (B)  $\text{Fe}^{3+}$  (inset: the effect of  $\text{Fe}^{3+}$  concentration on absorption intensity at 465 nm).

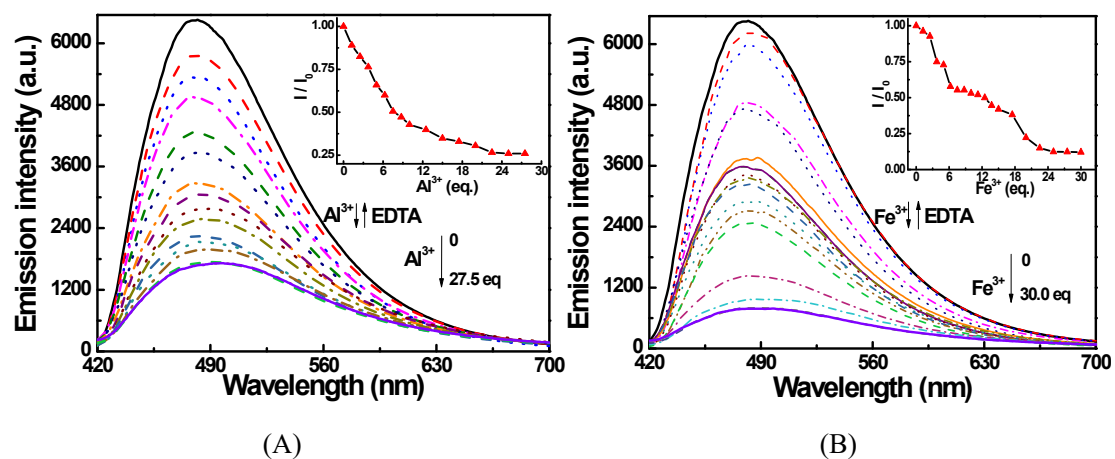

**Figure S20.** PL intensity changes of **BTPT-2-PAo** ( $C = 2.0 \times 10^{-5} \text{ mol L}^{-1}$ ) by stimulation with metal ions: (A)  $\text{Al}^{3+}$ , and (B)  $\text{Fe}^{3+}$  (inset: the effect of  $\text{Cr}^{3+}$  concentration on emission intensities of **BTPT-2-PAo** at 482 nm.  $I_0$ : initial emission intensity of **BTPT-2-PAo**,  $I$ : emission intensity of **BTPT-2-PAo** in the presence of  $\text{Al}^{3+}$  and  $\text{Fe}^{3+}$ ).



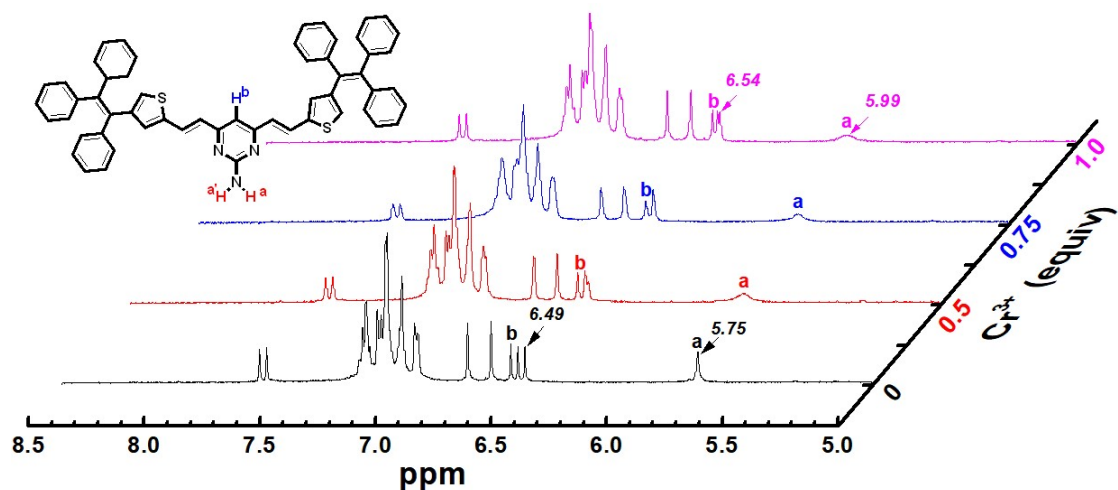

(A)

Spectrum from 220920pos-41物质3cr.wiff (sample 1) - Sample013, +TOF MS (150 - 1600) from 0.112 to 0.460 min

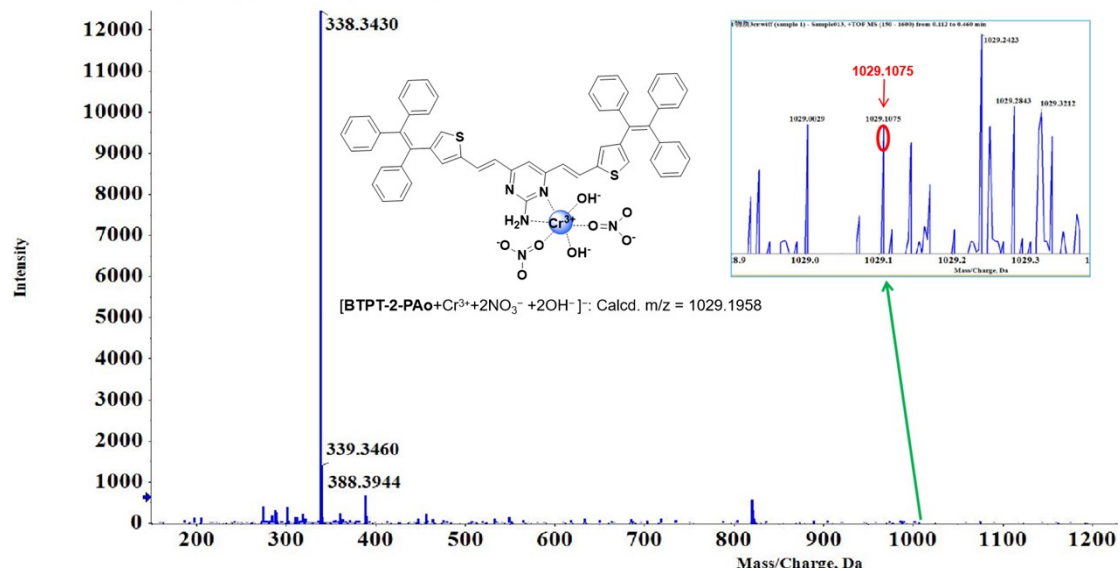

(B)

**Figure S21.** Changes in  $^1\text{H}$  NMR spectra of **BTPT-2-PAo** stimuli by different  $\text{Cr}^{3+}$  concentration

in  $\text{THF-}d_8$  (A), and HRMS-ESI spectra of  $[\text{BTPT-2-PAo}+\text{Cr}^{3+}]$  in acetonitrile (B).

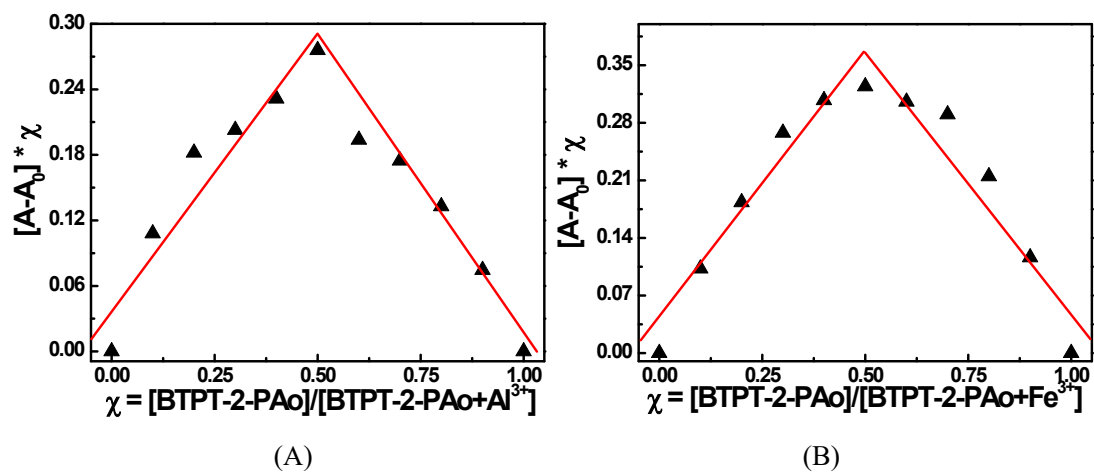

Figure S22. Job's plot for BTPT-2-PAo with  $\text{Al}^{3+}$  (A), and  $\text{Fe}^{3+}$  (B).

Spectrum from 220920pos-40物质3Al.wiff (sample 1) - Sample012, +TOF MS (150 - 1600) from 0.191 min

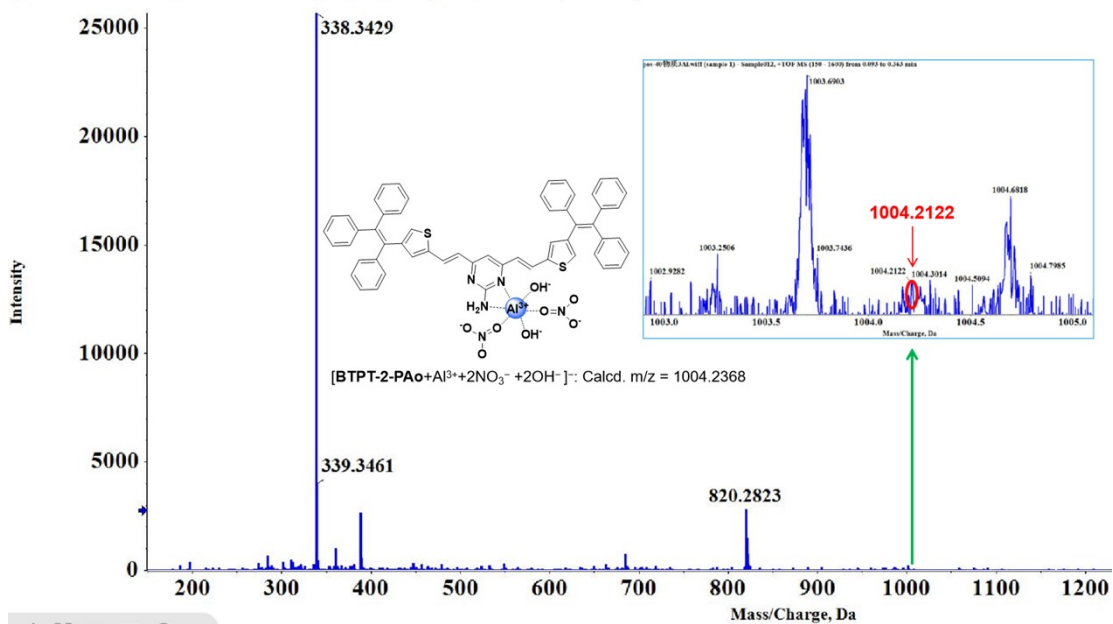

(A)

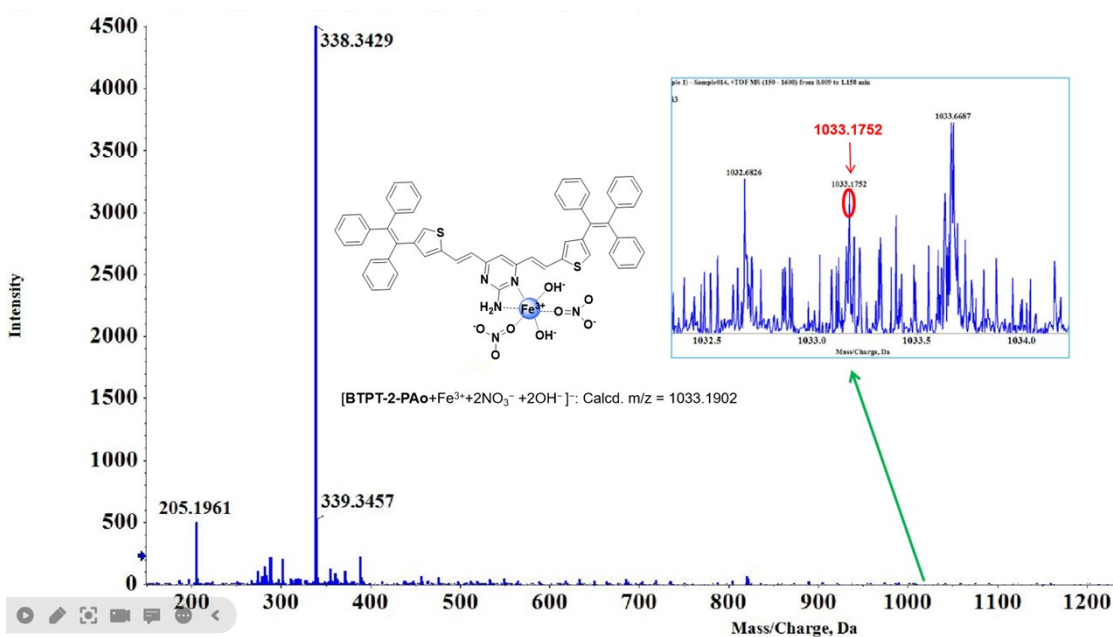

(B)

Figure S23. HRMS-ESI spectra of [BTPT-2-PAo + Al<sup>3+</sup>] (A) and [BTPT-2-PAo + Fe<sup>3+</sup>] (B) in acetonitrile.

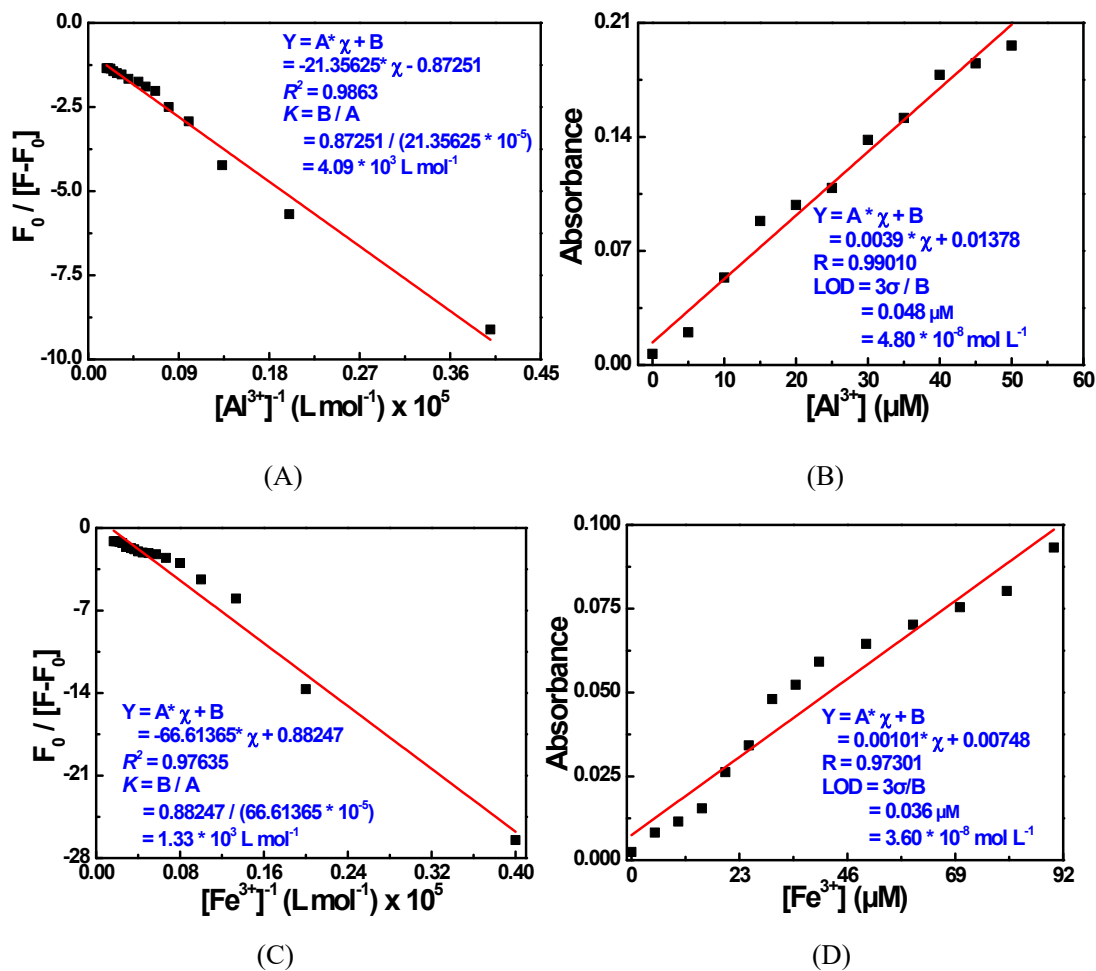

**Figure S24.** (A) The binding constant for **BTPT-2-PAo** with  $Al^{3+}$  was calculated to be  $4.09 \times 10^3$   $L mol^{-1}$ , (B) the limit of detection (LOD), LOD is  $4.80 \times 10^{-8} mol L^{-1}$ , (C) The binding constant for **BTPT-2-PAo** with  $Fe^{3+}$  was calculated to be  $1.33 \times 10^3 L mol^{-1}$ , and (D) the limit of detection (LOD), LOD is  $3.60 \times 10^{-8} mol L^{-1}$ .

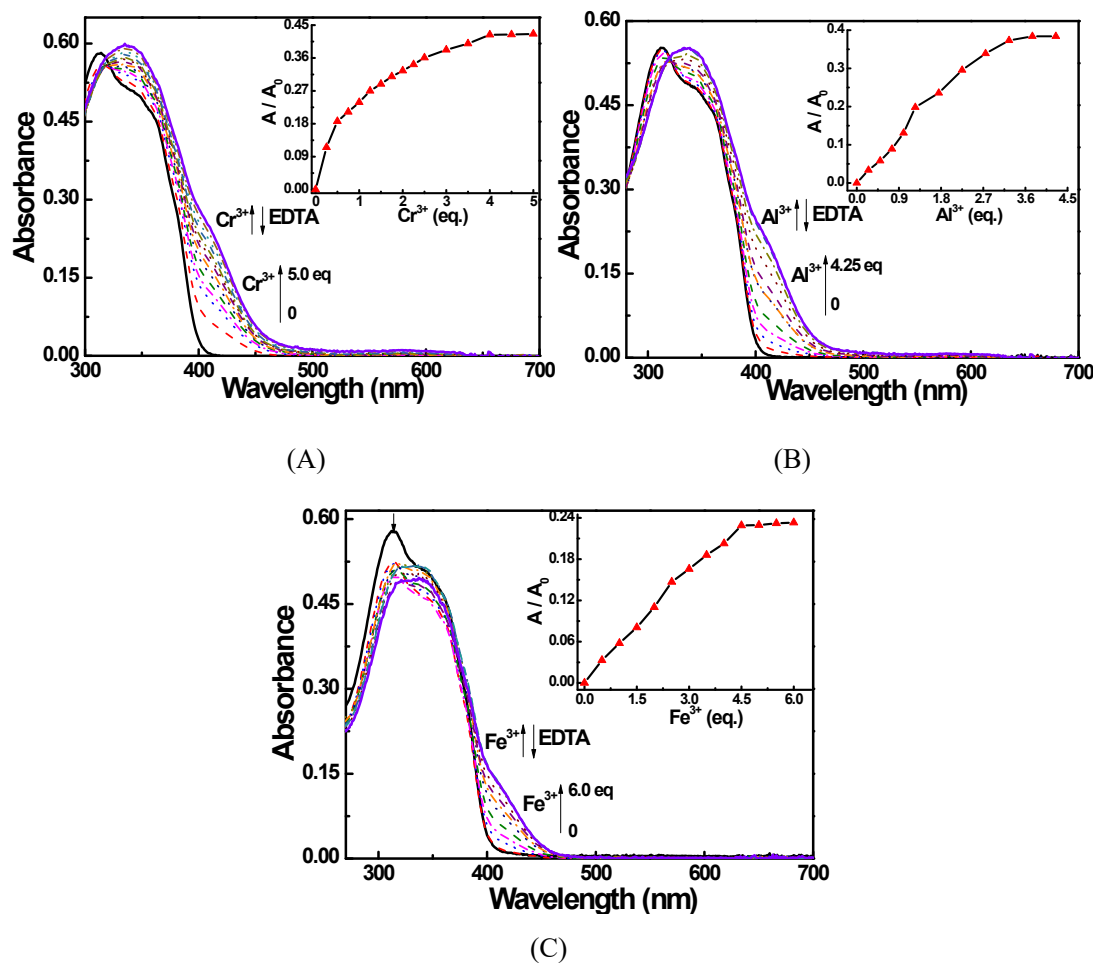

**Figure S25.** Absorption spectral changes of **TPT-2-PAo** by stimulation with metal ions in THF ( $C = 2.0 \times 10^{-5} \text{ mol L}^{-1}$ ): (A)  $\text{Cr}^{3+}$ , (B)  $\text{Al}^{3+}$ , and (C)  $\text{Fe}^{3+}$  (inset: the effect of  $\text{Cr}^{3+}$  concentration on absorption intensity of **TPT-2-PAo** at 410 nm,  $A_0$ : initial absorption intensity of **TPT-2-PAo**, A: absorption intensity of **BTPT-2-PAo** in the presence of  $\text{M}^{3+}$ ).

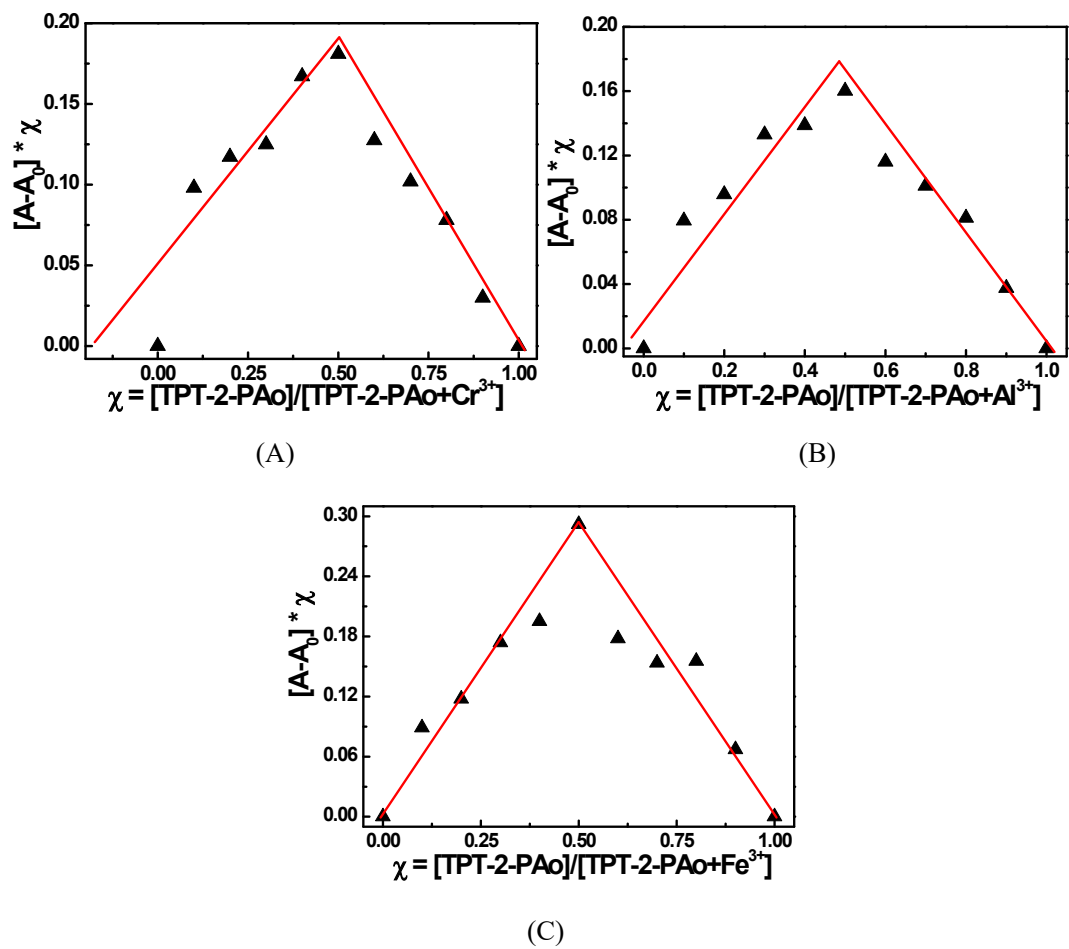

Figure S26. Job's plot for TPT-2-PAo with  $\text{Al}^{3+}$  (A),  $\text{Cr}^{3+}$  (B), and  $\text{Fe}^{3+}$  (C).

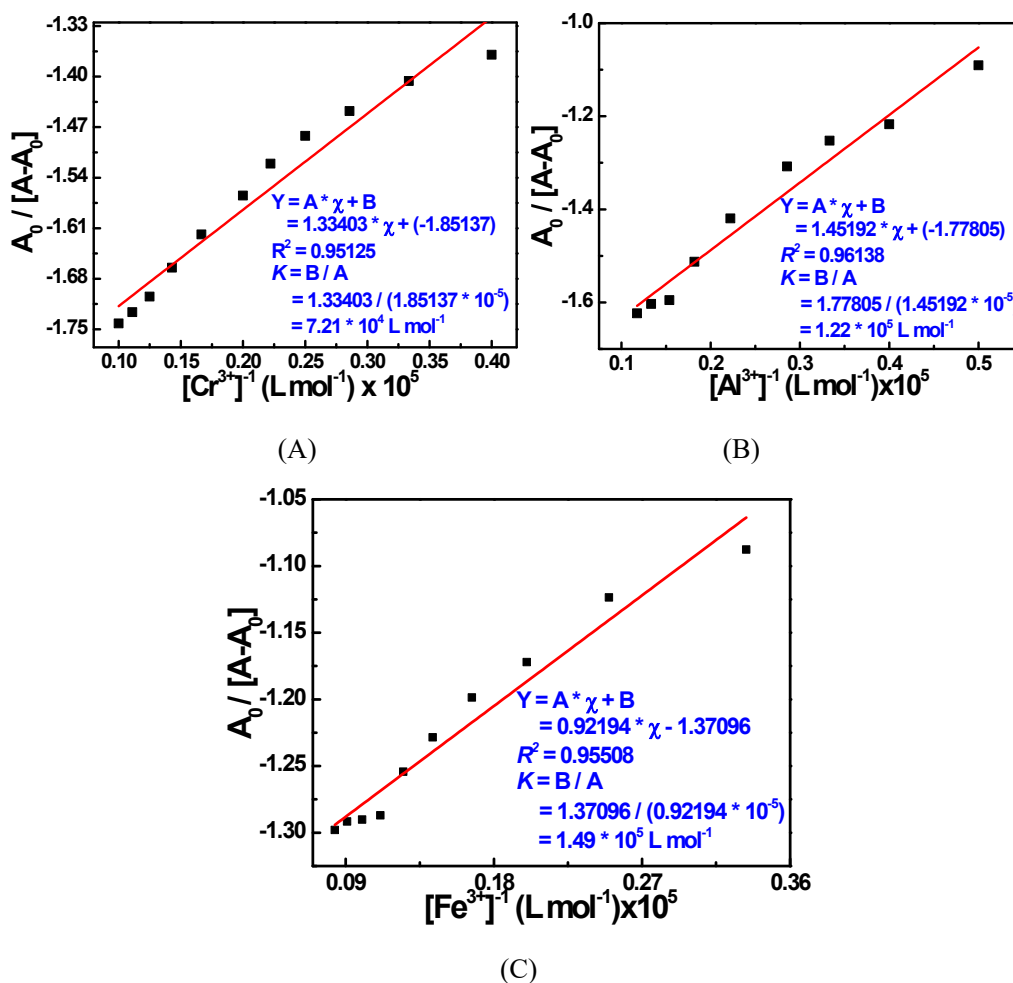

**Figure S27.** Hildebrand-Benesi plot based on the 1:1 ratio between **TPT-2-PAo** and  $M^{3+}$  ( $M = Al, Cr, Fe$ ): (A) the binding constant for **TPT-2-PAo** with  $Cr^{3+}$  was calculated to be  $7.21 \times 10^4 \text{ L mol}^{-1}$ ; (B) the binding constant for **TPT-2-PAo** with  $Al^{3+}$  was calculated to be  $1.22 \times 10^5 \text{ L mol}^{-1}$ ; (C) the binding constant for **TPT-2-PAo** with  $Fe^{3+}$  was calculated to be  $1.49 \times 10^5 \text{ L mol}^{-1}$ .

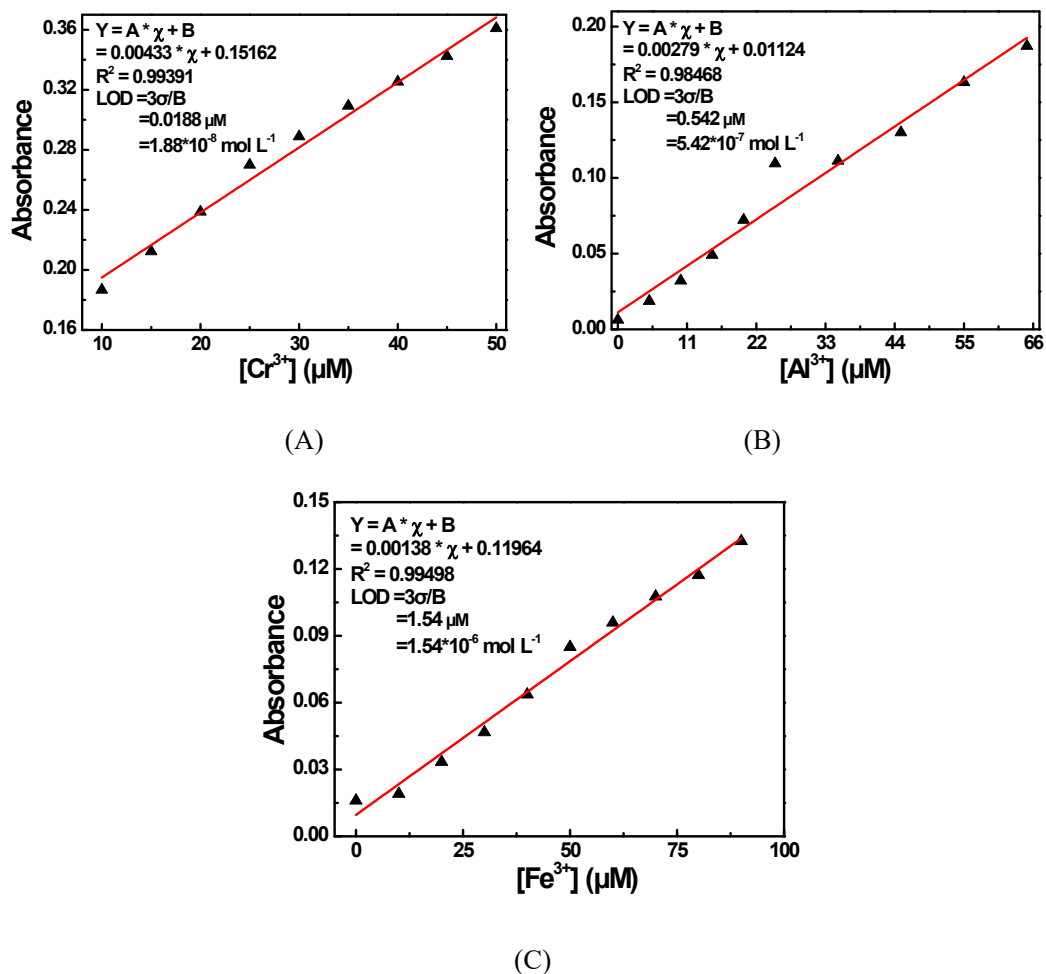

**Figure S28.** (A) The limit of detection (LOD) of TPT-2-PAo with  $\text{Cr}^{3+}$ , LOD is  $1.88 \times 10^{-8} \text{ mol L}^{-1}$ ; (B) the limit of detection (LOD) of TPT-2-PAo with  $\text{Al}^{3+}$ , LOD is  $5.42 \times 10^{-7} \text{ mol L}^{-1}$ ; (C) the limit of detection (LOD) of TPT-2-PAo with  $\text{Fe}^{3+}$ , LOD is  $1.54 \times 10^{-6} \text{ mol L}^{-1}$ .



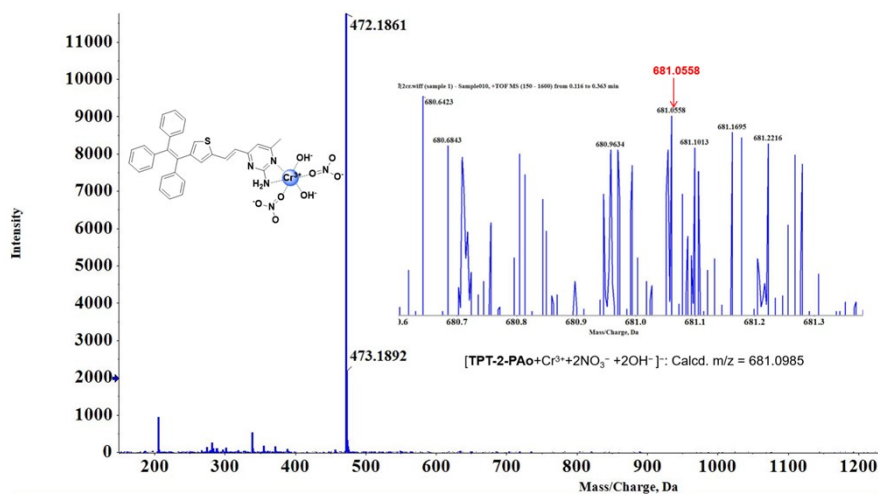

(A)

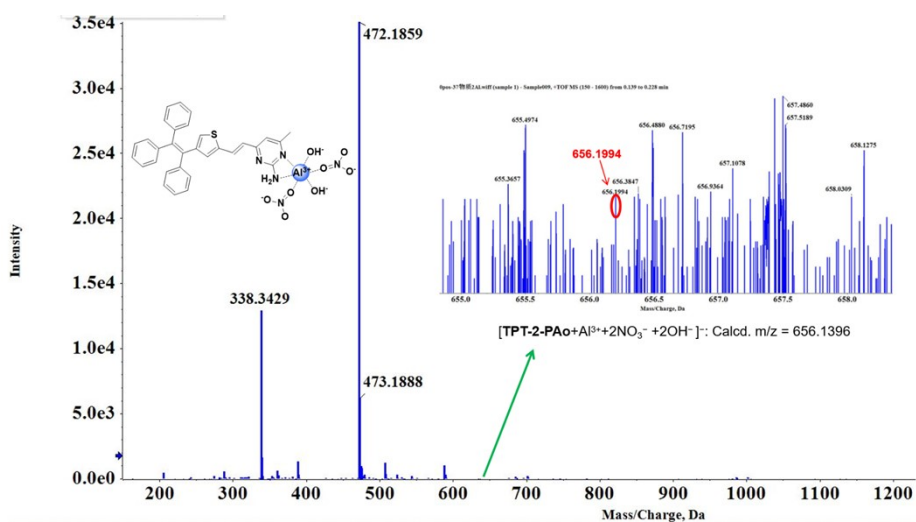

(B)

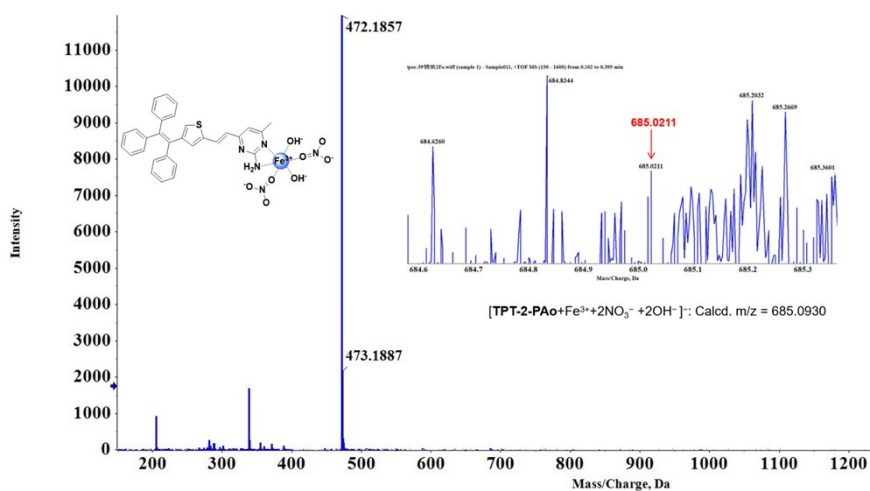

(C)

**Figure S29.** HRMS-ESI spectra of [TPT-2-PAo+M<sup>3+</sup>] in acetonitrile: (A) [TPT-2-PAo+Cr<sup>3+</sup>], (B) [TPT-2-PAo+Al<sup>3+</sup>], and (C) [TPT-2-PAo+Fe<sup>3+</sup>].

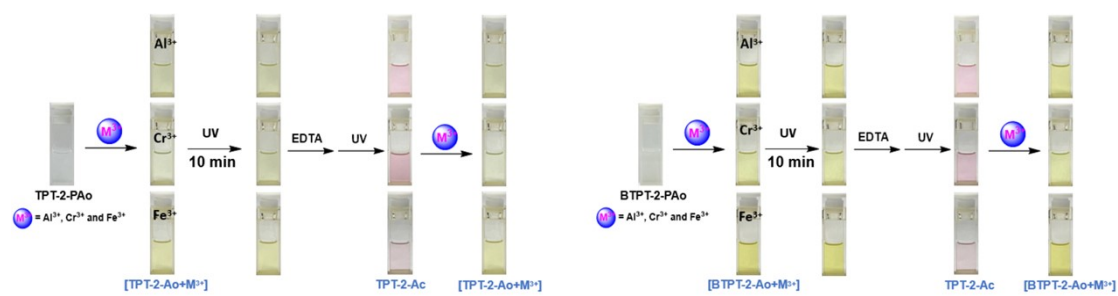

**Figure S30.** The color changes of **TPT-2-PAo** and **BTPT-2-PAo** under various stimuli including UV, EDTA and metal ions.

**Table S1.** The characteristics of **TPT-2-PAo** in different solvents.

| <b>TPT-2-PAo</b>                                            | <i>n</i> -hex     | EA                | THF               | DCM               | DMSO              | DMF               | MeCN              | MeOH              |
|-------------------------------------------------------------|-------------------|-------------------|-------------------|-------------------|-------------------|-------------------|-------------------|-------------------|
| $\Delta f^a$                                                | 0.001             | 0.201             | 0.21              | 0.218             | 0.263             | 0.274             | 0.307             | 0.309             |
| $\lambda_{\text{abs}} \text{ (nm)}^b$                       | 315               | 311               | 320               | 316               | 314               | 311               | 310               | 314               |
| $\lambda_{\text{em}} \text{ (nm)}^c$                        | 480               | 484               | 470               | 523               | 505               | 487               | 532               | 563               |
| Stokes $\text{(nm)}^d$                                      | 165               | 173               | 150               | 207               | 191               | 176               | 222               | 249               |
| $\Phi^e$                                                    | 0.034             | 0.014             | 0.009             | 0.006             | 0.014             | 0.01              | 0.003             | 0.015             |
| $\varepsilon \text{ (mol}^{-1} \text{ L cm}^{-1}\text{)}^f$ | $3.3 \times 10^4$ | $3.2 \times 10^4$ | $2.7 \times 10^4$ | $3.0 \times 10^4$ | $3.1 \times 10^4$ | $3.1 \times 10^4$ | $2.9 \times 10^4$ | $3.1 \times 10^4$ |

<sup>a</sup> Directed polarizability ( $\Delta f$ ); <sup>b</sup> maximum absorption wavelength; <sup>c</sup> maximum emission wavelength; <sup>d</sup> Stokes displacement (nm); <sup>e</sup> fluorescence quantum yield; <sup>f</sup> molar extinction coefficient.

**Table S2.** The characteristics of **BTPT-2-PAo** in different solvents.

| <b>BTPT-2-PAo</b>                                  | <i>n</i> -hex     | EA                | THF               | DCM               | DMSO              | DMF               | MeCN              | MeOH              |
|----------------------------------------------------|-------------------|-------------------|-------------------|-------------------|-------------------|-------------------|-------------------|-------------------|
| $\Delta f^a$                                       | 0.001             | 0.201             | 0.21              | 0.218             | 0.263             | 0.274             | 0.307             | 0.309             |
| $\lambda_{\text{abs}}(\text{nm})^b$                | 309               | 312               | 314               | 311               | 315               | 312               | 314               | 313               |
| $\lambda_{\text{em}}(\text{nm})^c$                 | 469               | 479               | 482               | 518               | 500               | 499               | 531               | 544               |
| Stokes(nm) <sup>d</sup>                            | 160               | 167               | 168               | 207               | 185               | 187               | 217               | 231               |
| $\Phi^e$                                           | 0.043             | 0.065             | 0.077             | 0.053             | 0.055             | 0.034             | 0.038             | 0.017             |
| $\varepsilon (\text{mol}^{-1} \text{L cm}^{-1})^f$ | $5.5 \times 10^4$ | $5.8 \times 10^4$ | $5.9 \times 10^4$ | $5.7 \times 10^4$ | $5.6 \times 10^4$ | $5.3 \times 10^4$ | $5.2 \times 10^4$ | $5.6 \times 10^4$ |

<sup>a</sup> Directed polarizability ( $\Delta f$ ); <sup>b</sup> maximum absorption wavelength; <sup>c</sup> maximum emission wavelength; <sup>d</sup> Stokes displacement (nm); <sup>e</sup> fluorescence quantum yield; <sup>f</sup> molar extinction coefficient.

**Table S3.** Photophysical properties of **TPT-2-PAo** aggregates at different pH.

| pH                                                                 | 1                        | 2                        | 3                        | 4                        | 5                        | 6                        | 7                        | 8                        | 9                        | 10                       | 11                       |
|--------------------------------------------------------------------|--------------------------|--------------------------|--------------------------|--------------------------|--------------------------|--------------------------|--------------------------|--------------------------|--------------------------|--------------------------|--------------------------|
| $\lambda_{\text{abs}}$ (nm) <sup>a</sup>                           | 348                      | 344                      | 344                      | 337                      | 337                      | 337                      | 313                      | 313                      | 314                      | 313                      | 312                      |
| $\lambda_{\text{em}}$ (nm) <sup>b</sup>                            | 645                      | 639                      | 637                      | 627                      | 628                      | 626                      | 470                      | 481                      | 485                      | 504                      | 506                      |
| Stokes<br>(nm) <sup>c</sup>                                        | 297                      | 295                      | 293                      | 290                      | 291                      | 289                      | 157                      | 168                      | 171                      | 191                      | 194                      |
| $\Phi^{\text{d}}$                                                  | 0.001                    | 0.007                    | 0.01                     | 0.043                    | 0.041                    | 0.048                    | 0.009                    | 0.024                    | 0.021                    | 0.028                    | 0.034                    |
| $\epsilon$ (mol <sup>-1</sup> L<br>cm <sup>-1</sup> ) <sup>e</sup> | 3.6 ×<br>10 <sup>4</sup> | 3.3 ×<br>10 <sup>4</sup> | 3.4 ×<br>10 <sup>4</sup> | 3.4 ×<br>10 <sup>4</sup> | 3.3 ×<br>10 <sup>4</sup> | 3.1 ×<br>10 <sup>4</sup> | 2.8 ×<br>10 <sup>4</sup> | 3.1 ×<br>10 <sup>4</sup> | 3.4 ×<br>10 <sup>4</sup> | 3.7 ×<br>10 <sup>4</sup> | 4.6 ×<br>10 <sup>4</sup> |

<sup>a</sup> Maximum absorption wavelength; <sup>b</sup> maximum emission wavelength; <sup>c</sup> Stokes displacement (nm); <sup>d</sup> fluorescence quantum yield; <sup>e</sup> molar extinction coefficient.

**Table S4.** Photophysical properties of **BTPT-2-PAo** aggregates at different pH.

| pH                                                                 | 1                        | 2                        | 3                        | 4                        | 5                        | 6                        | 7                        | 8                        | 9                        | 10                       | 11                       |
|--------------------------------------------------------------------|--------------------------|--------------------------|--------------------------|--------------------------|--------------------------|--------------------------|--------------------------|--------------------------|--------------------------|--------------------------|--------------------------|
| $\lambda_{\text{abs}}$ (nm) <sup>a</sup>                           | 465                      | 465                      | 465                      | 465                      | 463                      | 465                      | 313                      | 313                      | 313                      | 313                      | 313                      |
| $\lambda_{\text{em}}$ (nm) <sup>b</sup>                            | 606                      | 607                      | 630                      | 630                      | 620                      | 621                      | 482                      | 485                      | 489                      | 493                      | 493                      |
| Stokes<br>(nm) <sup>c</sup>                                        | 141                      | 142                      | 165                      | 165                      | 157                      | 156                      | 169                      | 172                      | 176                      | 180                      | 180                      |
| $\Phi^{\text{d}}$                                                  | 0.003                    | 0.009                    | 0.005                    | 0.008                    | 0.012                    | 0.011                    | 0.077                    | 0.069                    | 0.064                    | 0.061                    | 0.075                    |
| $\epsilon$ (mol <sup>-1</sup> L<br>cm <sup>-1</sup> ) <sup>e</sup> | 4.6 ×<br>10 <sup>4</sup> | 4.7 ×<br>10 <sup>4</sup> | 4.5 ×<br>10 <sup>4</sup> | 4.6 ×<br>10 <sup>4</sup> | 4.5 ×<br>10 <sup>4</sup> | 4.5 ×<br>10 <sup>4</sup> | 5.3 ×<br>10 <sup>4</sup> | 5.4 ×<br>10 <sup>4</sup> | 5.6 ×<br>10 <sup>4</sup> | 5.9 ×<br>10 <sup>4</sup> | 6.6 ×<br>10 <sup>4</sup> |

<sup>a</sup> Maximum absorption wavelength; <sup>b</sup> maximum emission wavelength; <sup>c</sup> Stokes displacement (nm); <sup>d</sup> fluorescence quantum yield; <sup>e</sup> molar extinction coefficient.

**Table S5. Symbolic Z-Matrix of TPT-2-PAo.**

---

|   |          |          |          |
|---|----------|----------|----------|
| C | -7.41174 | 0.11846  | -0.66001 |
| C | -7.13019 | -1.18151 | -0.23571 |
| C | -5.81689 | -1.64744 | -0.2311  |
| C | -4.75699 | -0.81675 | -0.63003 |
| C | -5.05601 | 0.48352  | -1.06823 |
| C | -6.36913 | 0.94652  | -1.08212 |
| C | -3.3615  | -1.33065 | -0.62751 |
| C | -3.18736 | -2.69742 | -1.18708 |
| C | -2.31031 | -0.60248 | -0.14826 |
| C | -2.50613 | 0.63672  | 0.65453  |
| C | -0.9022  | -0.99395 | -0.37676 |
| C | -1.78337 | 1.804    | 0.36052  |
| C | -1.9662  | 2.96372  | 1.11141  |
| C | -2.86082 | 2.9715   | 2.18348  |
| C | -3.56915 | 1.8101   | 2.4991   |
| C | -3.39288 | 0.65438  | 1.74209  |
| C | -2.45203 | -3.67382 | -0.49623 |
| C | -2.28698 | -4.95047 | -1.02832 |
| C | -2.85629 | -5.27603 | -2.26126 |
| C | -3.60505 | -4.31931 | -2.95033 |
| C | -3.77839 | -3.04542 | -2.41242 |
| C | -0.53306 | -2.13702 | -1.05317 |
| S | 1.18213  | -2.34309 | -1.15044 |
| C | 1.44991  | -0.86346 | -0.23488 |
| C | 0.24857  | -0.28061 | 0.09452  |
| C | 2.76071  | -0.36772 | 0.1053   |
| C | 3.94052  | -0.94456 | -0.20562 |
| C | 5.26421  | -0.43071 | 0.13895  |
| N | 6.29465  | -1.19964 | -0.25773 |
| C | 7.52646  | -0.75446 | 0.04838  |
| N | 7.83737  | 0.36795  | 0.72058  |
| C | 6.80036  | 1.12778  | 1.10788  |
| C | 5.48253  | 0.77091  | 0.83421  |

---

---

|   |          |          |          |
|---|----------|----------|----------|
| C | 7.14045  | 2.38801  | 1.85661  |
| N | 8.57658  | -1.51072 | -0.40202 |
| H | -8.43573 | 0.48101  | -0.66929 |
| H | -7.93461 | -1.83533 | 0.08976  |
| H | -5.60159 | -2.66177 | 0.09113  |
| H | -4.24907 | 1.13008  | -1.39607 |
| H | -6.57957 | 1.9549   | -1.42746 |
| H | -1.08214 | 1.79858  | -0.46845 |
| H | -1.40835 | 3.86154  | 0.86008  |
| H | -2.99991 | 3.87361  | 2.77248  |
| H | -4.25814 | 1.80298  | 3.33905  |
| H | -3.94694 | -0.24606 | 1.98589  |
| H | -2.00611 | -3.4201  | 0.45998  |
| H | -1.71475 | -5.69269 | -0.47898 |
| H | -2.72456 | -6.27049 | -2.67804 |
| H | -4.05722 | -4.56651 | -3.90683 |
| H | -4.36724 | -2.30451 | -2.94485 |
| H | -1.19016 | -2.86727 | -1.50424 |
| H | 0.18839  | 0.6384   | 0.664    |
| H | 2.74514  | 0.56618  | 0.66378  |
| H | 3.96453  | -1.87941 | -0.76107 |
| H | 4.66353  | 1.40162  | 1.15712  |
| H | 6.24301  | 2.93636  | 2.15535  |
| H | 7.72463  | 2.14859  | 2.75192  |
| H | 7.76223  | 3.04029  | 1.23329  |
| H | 9.46774  | -1.34407 | 0.04284  |
| H | 8.36269  | -2.46503 | -0.6537  |

---



**Table S6.** Total energies of **TPT-2-PAo**.

---

|                                              |                             |
|----------------------------------------------|-----------------------------|
| Zero-point correction                        | 0.479514 (Hartree/Particle) |
| Thermal correction to Energy                 | 0.509779                    |
| Thermal correction to Enthalpy               | 0.510724                    |
| Thermal correction to Gibbs Free Energy      | 0.413522                    |
| Sum of electronic and zero-point Energies    | -1758.475125                |
| Sum of electronic and thermal Energies       | -1758.444860                |
| Sum of electronic and thermal Enthalpies=    | -1758.443916                |
| Sum of electronic and thermal Free Energies= | -1758.541117                |

---

**Table S7.** Symbolic Z-Matrix of TPT-2-PAc.

---

|   |          |          |          |
|---|----------|----------|----------|
| C | 1.85442  | 1.83709  | 0        |
| C | 2.78108  | 2.51303  | 0.68862  |
| C | 3.53975  | 1.88071  | 1.59842  |
| C | 3.39922  | 0.57476  | 1.92624  |
| C | 2.51981  | -0.08151 | 1.13192  |
| C | 1.74647  | 0.52073  | 0.21447  |
| C | 4.18359  | -0.05026 | 2.85243  |
| C | 4.08165  | -1.3901  | 3.05633  |
| C | 5.03357  | 0.57104  | 3.71945  |
| C | 4.82466  | 1.82484  | 4.19317  |
| C | 5.9857   | -0.16911 | 4.33487  |
| C | 5.85691  | 2.64033  | 4.5002   |
| C | 5.66412  | 3.88101  | 4.97486  |
| C | 4.42055  | 4.34558  | 5.16331  |
| C | 3.38032  | 3.55471  | 4.86773  |
| C | 3.58243  | 2.3164   | 4.39056  |
| C | 2.89071  | -1.96033 | 3.33126  |
| C | 2.75336  | -3.2353  | 3.7312   |
| C | 3.79649  | -4.05044 | 3.94735  |
| C | 5.04651  | -3.61842 | 3.74246  |
| C | 5.31705  | -2.2505  | 3.18802  |
| C | 6.48086  | -1.45854 | 3.75869  |
| S | 7.36765  | -2.08067 | 5.18415  |
| C | 7.25066  | -0.93361 | 6.10307  |
| C | 6.49184  | 0.04212  | 5.56699  |
| C | 7.79598  | -0.95857 | 7.33557  |
| C | 8.57796  | -1.93814 | 7.83205  |
| C | 9.15696  | -1.94514 | 9.05005  |
| N | 9.85196  | -2.92614 | 9.45305  |
| C | 10.38496 | -2.92914 | 10.60505 |
| N | 10.26196 | -1.96214 | 11.41805 |
| C | 9.58696  | -0.94714 | 11.08605 |
| C | 9.00096  | -0.89814 | 9.88105  |

---

---

|   |          |          |          |
|---|----------|----------|----------|
| C | 9.48296  | 0.15586  | 12.10905 |
| N | 11.06396 | -3.94014 | 10.95805 |
| H | 1.23545  | 2.3399   | -0.76133 |
| H | 2.93533  | 3.58571  | 0.48196  |
| H | 4.32104  | 2.51899  | 2.035    |
| H | 2.38574  | -1.17288 | 1.16651  |
| H | 1.03273  | -0.06829 | -0.38695 |
| H | 6.90137  | 2.32861  | 4.32417  |
| H | 6.52973  | 4.52725  | 5.20065  |
| H | 4.25815  | 5.36256  | 5.55769  |
| H | 2.35318  | 3.92036  | 5.0324   |
| H | 2.68851  | 1.69719  | 4.20215  |
| H | 1.96398  | -1.36021 | 3.32687  |
| H | 1.74237  | -3.61735 | 3.9588   |
| H | 3.62563  | -5.07562 | 4.31509  |
| H | 5.89551  | -4.3032  | 3.90733  |
| H | 7.23322  | -1.21322 | 2.96897  |
| H | 6.217    | 0.92373  | 6.16129  |
| H | 7.59393  | -0.09887 | 8.00085  |
| H | 8.77668  | -2.81859 | 7.19942  |
| H | 8.41096  | -0.01214 | 9.60205  |
| H | 8.69496  | 0.89586  | 11.84405 |
| H | 9.22796  | -0.24914 | 13.11505 |
| H | 10.44996 | 0.70286  | 12.18605 |
| H | 11.51496 | -3.96914 | 11.90505 |
| H | 11.17896 | -4.75614 | 10.30705 |
| H | 5.07295  | -2.11736 | 4.22126  |

---

**Table S8.** Total energies of **TPT-2-PAc**.

---

|                                              |                             |
|----------------------------------------------|-----------------------------|
| Zero-point correction                        | 0.480458 (Hartree/Particle) |
| Thermal correction to Energy                 | 0.509974                    |
| Thermal correction to Enthalpy               | 0.510918                    |
| Thermal correction to Gibbs Free Energy      | 0.416849                    |
| Sum of electronic and zero-point Energies    | -1758.445479                |
| Sum of electronic and thermal Energies       | -1758.415963                |
| Sum of electronic and thermal Enthalpies=    | -1758.415019                |
| Sum of electronic and thermal Free Energies= | -1758.509088                |

---

**Table S9.** Symbolic Z-Matrix of **BTPT-2-PAo**.

---

|   |          |          |          |
|---|----------|----------|----------|
| C | -2.81395 | -0.67442 | 0        |
| C | -3.83061 | -0.66347 | -0.87299 |
| C | -3.97323 | 0.36226  | -1.72705 |
| C | -3.12397 | 1.41325  | -1.7495  |
| C | -2.10596 | 1.36696  | -0.8612  |
| C | -1.95065 | 0.34999  | 0.00124  |
| C | -3.25573 | 2.44593  | -2.62726 |
| C | -4.47232 | 2.79475  | -3.12585 |
| C | -2.14227 | 3.13334  | -3.0093  |
| C | -0.99323 | 2.44753  | -3.25193 |
| C | -2.20439 | 4.48034  | -3.15034 |
| C | 0.23535  | 2.97894  | -3.08141 |
| C | 1.36076  | 2.28664  | -3.32564 |
| C | 1.2933   | 1.01936  | -3.7515  |
| C | 0.0892   | 0.45519  | -3.91672 |
| C | -1.0248  | 1.16132  | -3.66843 |
| C | -4.59717 | 3.38681  | -4.33284 |
| C | -5.78341 | 3.76512  | -4.83376 |
| C | -6.9064  | 3.56407  | -4.13313 |
| C | -6.81592 | 2.98674  | -2.92769 |
| C | -5.62306 | 2.61016  | -2.44171 |
| C | -3.24467 | 5.29683  | -2.90228 |
| S | -2.98652 | 6.7177   | -3.13492 |
| C | -1.57075 | 6.59457  | -3.50061 |
| C | -1.20694 | 5.30234  | -3.51674 |
| C | -0.72157 | 7.60628  | -3.76429 |
| C | -1.01276 | 8.92211  | -3.78242 |
| C | -0.11276 | 9.91311  | -3.95842 |
| N | -0.47676 | 11.08311 | -4.27642 |
| C | 0.37524  | 11.99911 | -4.49042 |
| N | 1.62324  | 11.80111 | -4.39642 |
| C | 2.08224  | 10.66811 | -4.05842 |
| C | 1.20424  | 9.67611  | -3.82342 |

---

---

|   |          |          |          |
|---|----------|----------|----------|
| C | 3.40924  | 10.45211 | -3.94942 |
| N | -0.03476 | 13.15611 | -4.81542 |
| C | 3.97485  | 9.28143  | -3.5969  |
| C | 5.29195  | 9.01943  | -3.50425 |
| S | 6.39194  | 9.95809  | -3.75814 |
| C | 7.49044  | 9.03402  | -3.47134 |
| C | 7.11586  | 7.79532  | -3.11029 |
| C | 5.77367  | 7.8171   | -3.14334 |
| C | 7.93328  | 6.76655  | -2.77459 |
| C | 9.28405  | 6.95393  | -2.80598 |
| C | 7.43609  | 5.55995  | -2.39441 |
| C | 10.0791  | 5.94577  | -3.25615 |
| C | 9.8095   | 8.13446  | -2.38301 |
| C | 8.11749  | 4.76453  | -1.54121 |
| C | 7.65673  | 3.56782  | -1.14497 |
| C | 6.48091  | 3.11619  | -1.60163 |
| C | 5.78623  | 3.87365  | -2.46063 |
| C | 6.26209  | 5.06899  | -2.84485 |
| C | 11.3503  | 5.7765   | -2.83147 |
| C | 12.12698 | 4.76944  | -3.26004 |
| C | 11.65288 | 3.88031  | -4.14261 |
| C | 10.39407 | 4.01617  | -4.57976 |
| C | 9.62906  | 5.02656  | -4.13941 |
| C | 10.96515 | 8.6327   | -2.87278 |
| C | 11.47636 | 9.80689  | -2.4671  |
| C | 10.83319 | 10.53146 | -1.54282 |
| C | 9.68143  | 10.06883 | -1.03814 |
| C | 9.18287  | 8.89486  | -1.45802 |
| H | -2.68923 | -1.51451 | 0.70272  |
| H | -4.54093 | -1.50805 | -0.89713 |
| H | -4.79822 | 0.27099  | -2.45217 |
| H | -1.37359 | 2.18833  | -0.7801  |
| H | -1.11344 | 0.35681  | 0.72049  |
| H | 0.37279  | 3.99176  | -2.67061 |
| H | 2.34574  | 2.7531   | -3.15738 |

---

---

|   |          |          |          |
|---|----------|----------|----------|
| H | 2.21169  | 0.44524  | -3.95513 |
| H | 0.01626  | -0.58722 | -4.26993 |
| H | -1.9766  | 0.64176  | -3.86931 |
| H | -3.72348 | 3.56495  | -4.98137 |
| H | -5.83818 | 4.24721  | -5.82513 |
| H | -7.88283 | 3.88313  | -4.53225 |
| H | -7.72836 | 2.84739  | -2.32452 |
| H | -5.62659 | 2.20209  | -1.41658 |
| H | -4.20869 | 4.99453  | -2.4706  |
| H | -0.1928  | 4.97531  | -3.78966 |
| H | 0.32243  | 7.30932  | -3.9676  |
| H | -2.06199 | 9.22562  | -3.61797 |
| H | 1.56524  | 8.67411  | -3.53942 |
| H | 4.07422  | 11.30917 | -4.15264 |
| H | 0.65324  | 13.92811 | -4.99842 |
| H | -1.06176 | 13.35211 | -4.90242 |
| H | 3.30168  | 8.44448  | -3.33963 |
| H | 8.52754  | 9.37046  | -3.60407 |
| H | 5.11827  | 6.9823   | -2.86091 |
| H | 9.0722   | 5.08772  | -1.09125 |
| H | 8.23755  | 2.95785  | -0.43317 |
| H | 6.0974   | 2.13309  | -1.28196 |
| H | 4.83101  | 3.50009  | -2.8666  |
| H | 5.66723  | 5.60225  | -3.60452 |
| H | 11.79344 | 6.43095  | -2.06163 |
| H | 13.15541 | 4.65936  | -2.87419 |
| H | 12.2849  | 3.0498   | -4.49693 |
| H | 9.9918   | 3.29404  | -5.31118 |
| H | 8.61653  | 5.08894  | -4.57279 |
| H | 11.51587 | 8.12142  | -3.67973 |
| H | 12.41486 | 10.18637 | -2.90844 |
| H | 11.24256 | 11.49757 | -1.20654 |
| H | 9.14711  | 10.65422 | -0.26903 |
| H | 8.24815  | 8.56129  | -0.97666 |

---

**Table S10.** Total energies of **BTPT-2-PAo**.

---

|                                              |                             |
|----------------------------------------------|-----------------------------|
| Zero-point correction                        | 0.809478 (Hartree/Particle) |
| Thermal correction to Energy                 | 0.861108                    |
| Thermal correction to Enthalpy               | 0.862052                    |
| Thermal correction to Gibbs Free Energy      | 0.711823                    |
| Sum of electronic and zero-point Energies    | -3118.728500                |
| Sum of electronic and thermal Energies       | -3118.676870                |
| Sum of electronic and thermal Enthalpies=    | -3118.675926                |
| Sum of electronic and thermal Free Energies= | -3118.826155                |

---



**Table S11.** Symbolic Z-Matrix of BTBT-2-PAc.

---

|   |         |          |        |
|---|---------|----------|--------|
| C | 1.0775  | 1.94707  | 0      |
| C | 0.0495  | 1.18807  | -0.412 |
| C | -1.2025 | 1.67807  | -0.528 |
| N | -1.3645 | 2.98507  | -0.227 |
| C | -0.3475 | 3.75507  | 0.189  |
| N | 0.8825  | 3.23707  | 0.308  |
| C | -2.2665 | 0.94807  | -0.949 |
| C | -3.0685 | 1.47807  | -1.923 |
| C | -2.4885 | -0.30193 | -0.458 |
| N | -2.7085 | 2.54807  | -2.681 |
| C | -4.1835 | 0.81607  | -2.306 |
| C | -3.7785 | -1.03893 | -0.74  |
| C | -3.5455 | -2.49093 | -1.007 |
| C | -2.6135 | -3.08493 | -0.246 |
| C | -1.8015 | -2.33393 | 0.52   |
| C | -1.7075 | -0.99393 | 0.402  |
| C | -3.6325 | 3.45407  | -3.072 |
| C | -3.3175 | 4.53107  | -3.807 |
| C | -2.0485 | 4.74007  | -4.184 |
| C | -1.1095 | 3.85907  | -3.816 |
| C | -1.4405 | 2.78707  | -3.078 |
| C | -4.7985 | 0.86007  | -3.506 |
| C | -5.7875 | -0.02893 | -3.733 |
| C | -5.9755 | -0.93793 | -2.589 |
| C | -4.8315 | -0.19893 | -1.428 |
| C | -6.4755 | -0.07393 | -4.89  |
| C | -7.4815 | -0.91593 | -5.204 |
| C | -8.1615 | -0.91293 | -6.37  |
| C | -9.1775 | -1.77293 | -6.577 |
| C | -9.8535 | -1.73493 | -7.74  |
| C | -9.4855 | -0.88093 | -8.603 |
| C | -8.5215 | -0.08793 | -8.383 |
| C | -7.8735 | -0.09693 | -7.294 |

---

---

|   |           |          |           |
|---|-----------|----------|-----------|
| S | -10.9035  | -2.51993 | -8.066    |
| C | -17.69416 | -9.78328 | -9.97713  |
| C | -16.72858 | -8.89486 | -10.26391 |
| C | -16.23382 | -8.00847 | -9.3676   |
| C | -16.90571 | -7.99838 | -8.1935   |
| C | -17.87349 | -8.87418 | -7.87816  |
| C | -18.26318 | -9.79653 | -8.76597  |
| C | -15.2695  | -7.09503 | -9.68205  |
| C | -14.70497 | -6.20995 | -8.8098   |
| C | -14.69367 | -7.0808  | -10.91136 |
| C | -14.52207 | -6.50726 | -7.49854  |
| C | -14.11872 | -5.09891 | -9.31347  |
| C | -14.44228 | -5.78601 | -11.64843 |
| C | -13.34466 | -5.88339 | -12.66725 |
| C | -12.87692 | -7.07615 | -13.05633 |
| C | -13.28885 | -8.20092 | -12.45431 |
| C | -14.12412 | -8.2004  | -11.40154 |
| C | -14.54679 | -5.56002 | -6.53671  |
| C | -14.36027 | -5.85578 | -5.24037  |
| C | -14.13752 | -7.12172 | -4.86388  |
| C | -14.10564 | -8.08269 | -5.79677  |
| C | -14.2967  | -7.77418 | -7.0894   |
| C | -13.12495 | -4.36141 | -8.77692  |
| C | -12.60571 | -3.37317 | -9.53315  |
| C | -13.26551 | -3.30318 | -10.84923 |
| S | -14.4759  | -4.61112 | -10.68448 |
| C | -11.58465 | -2.54628 | -9.22804  |
| C | -8.1965   | 0.74707  | -9.282    |
| H | -12.6965  | -4.5984  | -7.79485  |
| H | -11.27459 | -1.82871 | -10.00704 |
| H | -11.2199  | -3.22505 | -7.27853  |
| H | -9.4425   | -2.48493 | -5.782    |
| H | -4.4865   | 1.53407  | -4.318    |
| H | -6.1855   | 0.67507  | -5.648    |
| H | -7.7895   | -1.66093 | -4.451    |

---

---

|   |           |           |           |
|---|-----------|-----------|-----------|
| H | -15.49184 | -4.1528   | -10.62115 |
| H | -5.4335   | 0.39207   | -0.691    |
| H | 2.0925    | 1.51907   | 0.06      |
| H | 0.2915    | 0.15907   | -0.726    |
| H | -2.3605   | 3.46007   | -0.277    |
| H | -0.5215   | 4.81507   | 0.439     |
| H | 1.7245    | 3.86607   | 0.641     |
| H | -4.2395   | -3.07893  | -1.625    |
| H | -2.5125   | -4.18293  | -0.255    |
| H | -1.0645   | -2.85793  | 1.155     |
| H | -0.8595   | -0.54493  | 0.937     |
| H | -4.6865   | 3.36507   | -2.753    |
| H | -4.0985   | 5.25707   | -4.091    |
| H | -1.7825   | 5.62307   | -4.789    |
| H | -0.0645   | 4.01007   | -4.134    |
| H | -0.6265   | 2.07807   | -2.858    |
| H | -18.047   | -10.48951 | -10.74768 |
| H | -16.39039 | -8.93219  | -11.30985 |
| H | -16.73095 | -7.23536  | -7.41934  |
| H | -18.37784 | -8.81861  | -6.89842  |
| H | -19.06927 | -10.50861 | -8.52663  |
| H | -13.00382 | -4.97119  | -13.18245 |
| H | -12.12338 | -7.12948  | -13.86066 |
| H | -12.8352  | -9.15684  | -12.7731  |
| H | -14.22447 | -9.16679  | -10.87663 |
| H | -14.77507 | -4.50801  | -6.77874  |
| H | -14.40492 | -5.05834  | -4.47969  |
| H | -13.98349 | -7.37069  | -3.8006   |
| H | -13.91201 | -9.12768  | -5.50062  |
| H | -14.22104 | -8.60469  | -7.81334  |
| H | -7.4025   | 1.41407   | -9.123    |
| H | -8.7185   | 0.77507   | -10.192   |
| H | -4.21111  | -1.09698  | 0.23692   |
| H | -15.31898 | -5.65027  | -12.24667 |

---

**Table S12.** Total energies of **BTPT-2-PAc**.

---

|                                              |                             |
|----------------------------------------------|-----------------------------|
| Zero-point correction                        | 0.811868 (Hartree/Particle) |
| Thermal correction to Energy                 | 0.861819                    |
| Thermal correction to Enthalpy               | 0.862763                    |
| Thermal correction to Gibbs Free Energy      | 0.719522                    |
| Sum of electronic and zero-point Energies    | -3118.633682                |
| Sum of electronic and thermal Energies       | -3118.583731                |
| Sum of electronic and thermal Enthalpies=    | -3118.582787                |
| Sum of electronic and thermal Free Energies= | -3118.726028                |

---
